# Supplementary material for: TurboFold II: RNA structural alignment and secondary structure prediction informed by multiple homologs
Source: PubMed Central journal article supplement (PMC5714223; doi:10.1093/nar/gkx815), 2017-09-28
Supplement: gkx815_supp.pdf [file gkx815_supp.pdf]

## Supplementary information for

### **“TurboFold II: RNA Secondary Structure Prediction and Structural Alignment Informed by Multiple Homologs”**

**Zhen Tan, Yinghan Fu, Gaurav Sharma, and David H. Mathews**

Details of pairwise sequence identity (Section 1), database used in parameter optimization and testing (Section 2), parameter optimization methods (Section 3), sequences being used in parameter optimization and benchmarking (Section 4), tables of values about method performance on alignment and structure predictions (Section 5), benchmark of TurboFold II on BRALiBase 2.0 (Section 6) and accepted database structures and alignments for the example in the Discussion (*Nocardiooides albus*, *Propioniferax innocua*, and *Salt Marsh A26(12)*) (section 7) are provided.

#### Section 1. Pairwise sequence identity:

The pairwise sequence identity between two sequences is computed as the fraction of nucleotide positions for which the nucleotides are aligned and identical over the sum of aligned and inserted positions between the two sequences for the maximum likelihood alignment between the sequences. The sequence identity is computed with a pairwise alignment HMM (1,2). In Figure S1, histograms of pairwise sequence identity are provided for the datasets used in the benchmarks for each individual family: the 5S small subunit rRNA, group I intron RNA, tmRNA, tRNA, small subunit rRNA, RNase P RNA, SRP RNA, and telomerase RNA.

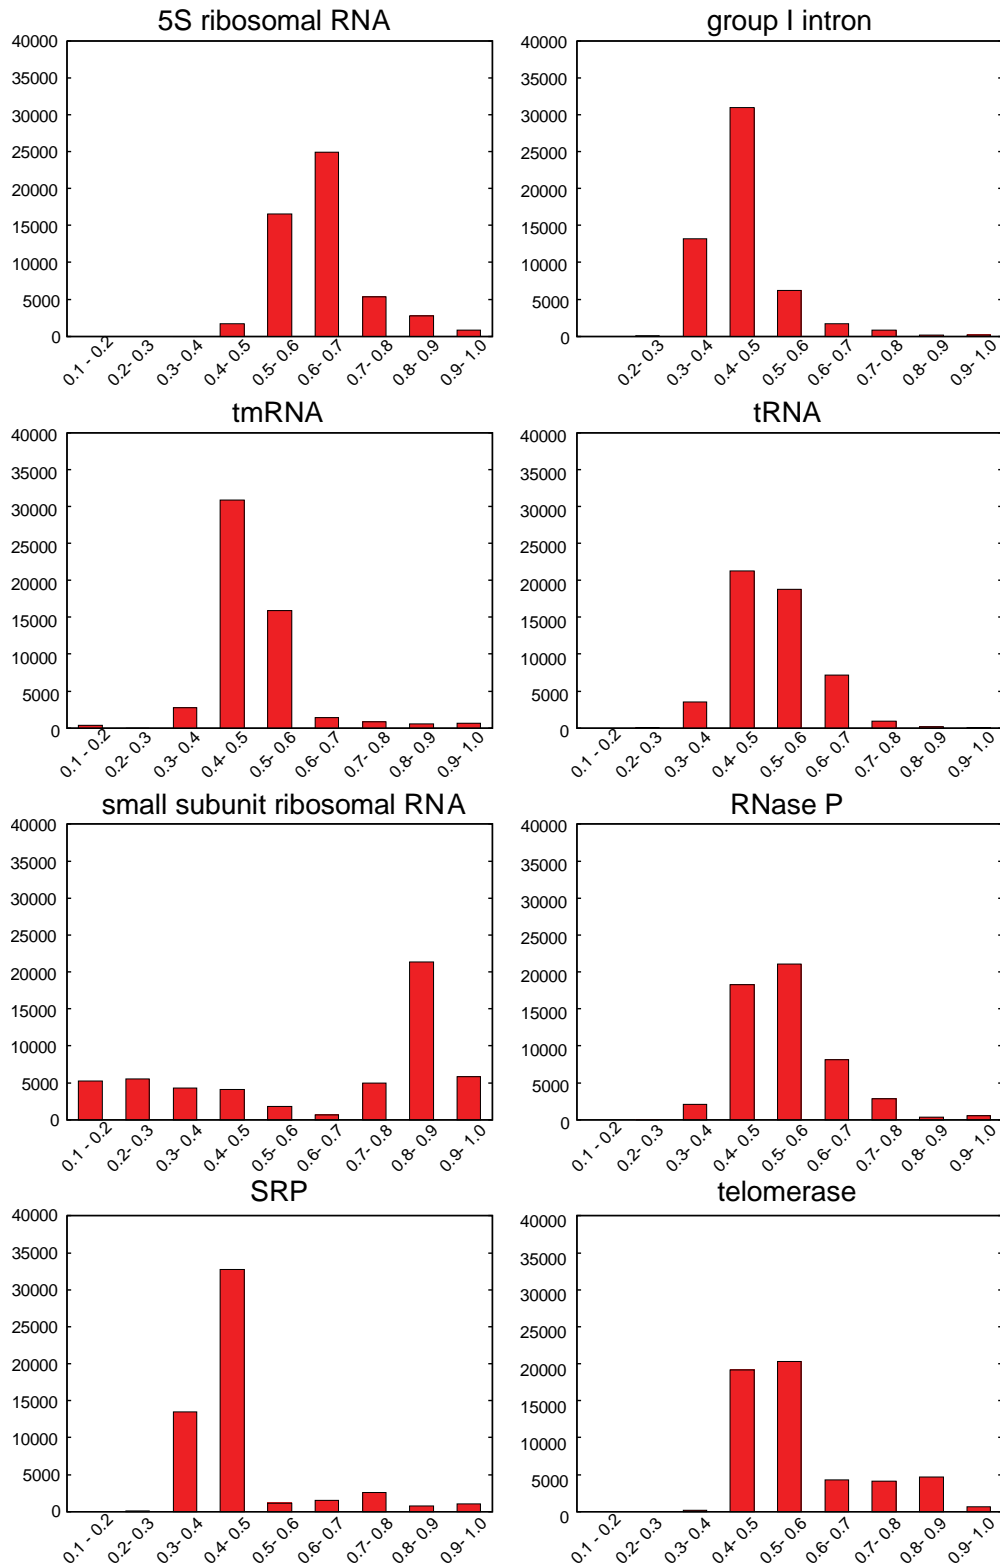

Figure S1. Histograms for pairwise sequence identity for the datasets used in the benchmarks by each individual family: 5S rRNA, group I intron RNA, tmRNA, tRNA, small subunit rRNA, RNase P RNA, SRP RNA, and telomerase RNA.

## Section 2. Database: RNAStralign

For parameter optimization and benchmarking, an RNA alignment and structure database, named RNAStralign, was aggregated from available online databases of RNA structure and alignment. Structures for each family in RNAStralign are categorized into homologous families based on the classifications in the original databases. If available, further categorization into subfamilies was also included in RNAStralign. Only sequences with known alignments and secondary structures were included. The families included are:

1. Small subunit ribosomal RNA (16S rRNA) family

Small subunit rRNA structures and alignments were downloaded from the Comparative RNA Web Site (3).

2. 5S ribosomal RNA (5S rRNA) family

5S rRNA structures and alignments were downloaded from the 5S Ribosomal RNA Database (4).

3. Group I intron family

Group I intron structures and alignments were downloaded from the Group I Intron Sequence and Structure Database (GISSD) (5). Structures with P1 and P2 domain competition are represented by two structure files which either have P1 or P10 domain and with "\_p1" or "\_p10" added to the end of their file names.

4. RNase P family

RNase P structures and alignments were downloaded from the RNase P Database (6). Only 7 subfamilies with at least two full length structures (Bacterial Type A RNA, Bacterial Type B RNA, Archaeal RNA, Nuclear RNA, Plastid RNA, Vertebrate Nuclear RNA and Yeast Nuclear RNA) are kept in our database.

5. Signal recognition particle RNA (SRP RNA) family

SRP RNA structures and alignments were downloaded from the Signal Recognition Particle Database (SRPDB) (7).

6. Telomerase RNA family

Telomerase RNA structures and alignment were downloaded from the Rfam database (8) RF00024 family.

7. Transfer-messenger RNA family

Transfer-messenger RNA structures and alignment were downloaded from tmRNA Database (9).

8. Transfer RNA (tRNA) family

tRNA structures and alignments were downloaded from tRNAdb 2009 (10). Because the structures in this database do not include variable loops, covariance models of RNA secondary structure (COVE) (<http://eddylab.org/software.html>) were used to annotate the variable loop base pairs.

### Section 3. Parameter optimization

The match scores for pairwise nucleotides  $i$  and  $k$  in two sequences are represented as

$$\rho(i, k) = \alpha_1 \left( \sqrt{P_{<}^m(i)P_{<}^n(k)} + \sqrt{P_{>}^m(i)P_{>}^n(k)} \right) + \alpha_2 \left( \sqrt{P_{\circ}^m(i)P_{\circ}^n(k)} \right) + \alpha_3$$

To train the three parameters in the match score scheme ( $\alpha_1$ ,  $\alpha_2$  and  $\alpha_3$ ), 40 groups of input sequences formed by 3, 5 and 7 homologous sequences, were randomly chosen from the 5S ribosome RNA (Eubacteria subfamily), group I intron (IC1 subfamily), tmRNA, and tRNA from the database RNAstralign.

A grid search was performed to find optimal parameter values. The search range for  $\alpha_1$  and  $\alpha_2$  were both by values of 0, 0.6, 0.8, 1.0, 2.0, 3.0, 4.0, and 5.0.  $\alpha_3$  was searched by values of 0, 0.3, 0.5, 0.7, and 1.0. Figure S2 shows the weighted accuracy of alignment and structure predictions by different parameters. The weighted accuracy is the product of sensitivity and positive predicted value (PPV) of averaged pairwise alignments predictions and averaged structure predictions by the number of input sequences. The sensitivity and PPV calculation are described in the Methods section of the paper. The highest accuracy is achieved by  $\alpha_1 = 1.0$ ,  $\alpha_2 = 0.8$  and  $\alpha_3 = 0.5$ , which were used as the default for the TurboFold II.

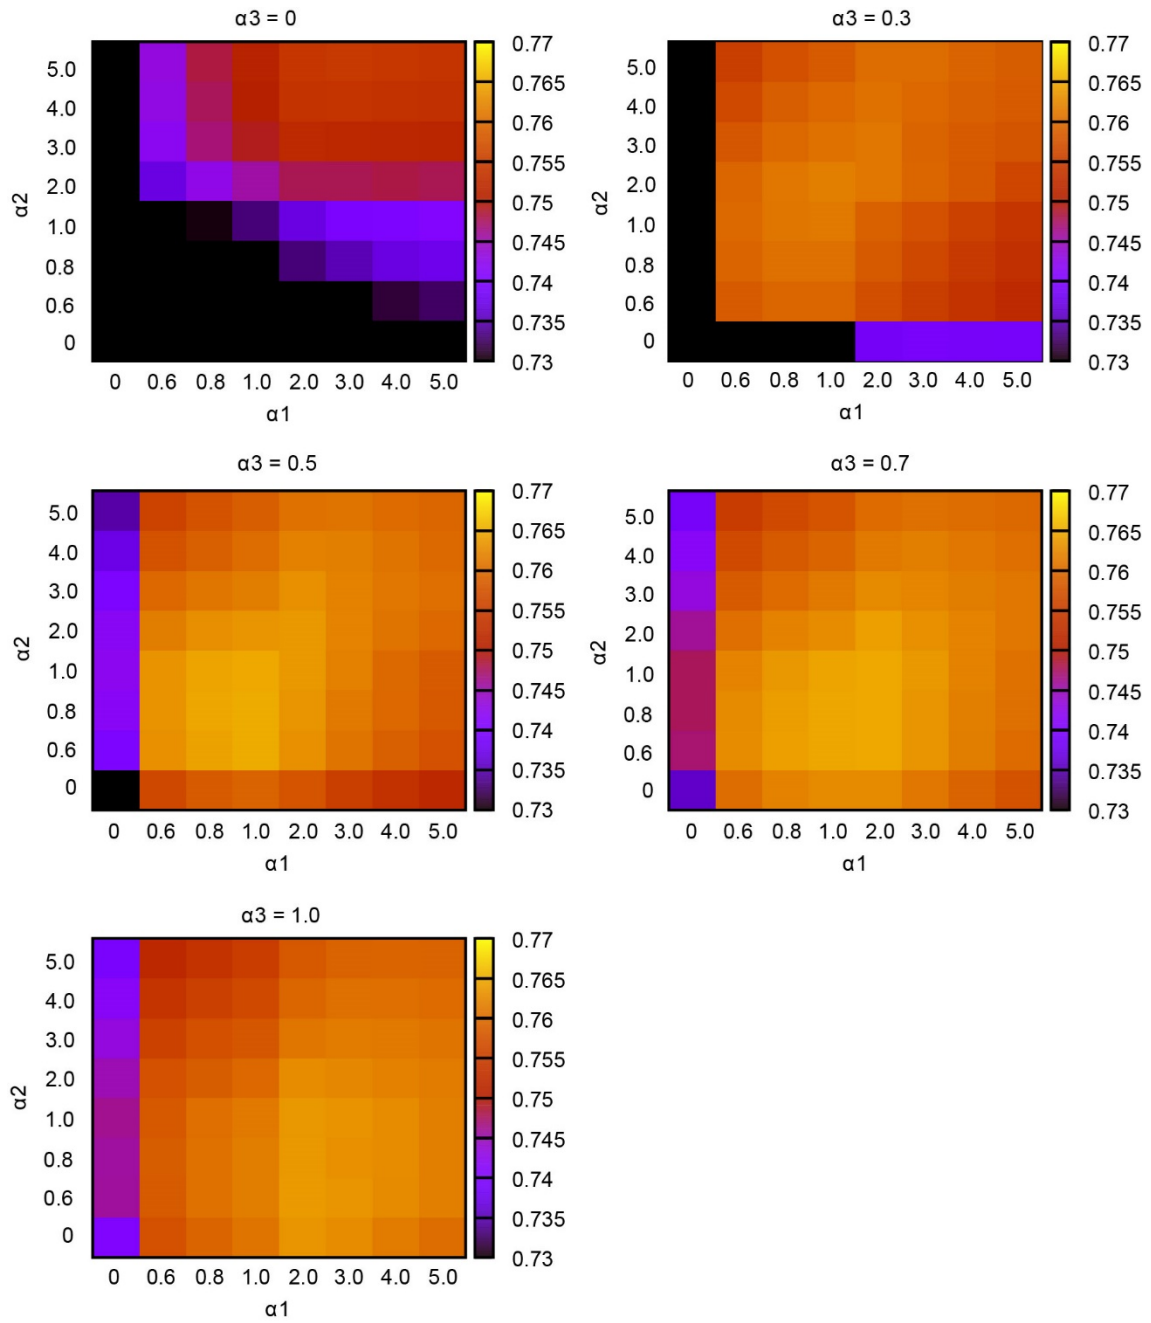

Figure S2. **Grid search plots for parameters  $\alpha_1$ ,  $\alpha_2$  and  $\alpha_3$  in match score function.** The heat map keys on the right side show that the grid cells with higher values are represented in lighter color.

#### Section 4. Sequences used in parameters optimization and benchmarking

Sequences were separated in 3, 5, 7, 10, and 20 input sequences for each family (parameter optimization: 5S ribosome RNA (Eubacteria subfamily), group I intron (IC1 subfamily), tmRNA, and tRNA; benchmarking: small subunit ribosomal RNA (Alphaproteobacteria subfamily), SRP RNA (Protozoan subfamily), RNase P RNA (A bacteria subfamily) and telomerase RNA). Specific sequences lists are provided in “TurboFoldII\_SelectedSequenceList.zip”.

Section 5. Performance of alignment methods on benchmarking dataset

Table S1. Alignment prediction sensitivity and PPV for each method on each dataset:

| <b>small subunit rRNA</b> |              |              |              |              |              |              |
|---------------------------|--------------|--------------|--------------|--------------|--------------|--------------|
|                           | 5 sequences  |              | 10 sequences |              | 20 sequences |              |
|                           | sensitivity  | PPV          | sensitivity  | PPV          | sensitivity  | PPV          |
| <b>TurboFold II</b>       | 0.949        | 0.961        | 0.957        | 0.968        | 0.956        | 0.968        |
| <b>Clustal Omega</b>      | <b>0.972</b> | <b>0.982</b> | <b>0.975</b> | <b>0.983</b> | <b>0.973</b> | <b>0.982</b> |
| <b>ClustalW</b>           | 0.912        | 0.911        | 0.910        | 0.909        | 0.906        | 0.906        |
| <b>LocARNA</b>            | 0.905        | 0.912        | 0.876        | 0.880        | 0.811        | 0.816        |
| <b>MXSCARNA</b>           | 0.902        | 0.914        | 0.929        | 0.941        | 0.932        | 0.945        |
| <b>ProbCons</b>           | 0.922        | 0.933        | 0.939        | 0.948        | 0.943        | 0.953        |
| <b>MAFFT</b>              | 0.942        | 0.951        | 0.956        | 0.964        | 0.960        | 0.969        |
| <b>R-Coffee</b>           | 0.934        | 0.949        | 0.951        | 0.964        | 0.951        | 0.965        |

  

| <b>RNase P</b>       |              |              |              |              |              |              |
|----------------------|--------------|--------------|--------------|--------------|--------------|--------------|
|                      | 5 sequences  |              | 10 sequences |              | 20 sequences |              |
|                      | sensitivity  | PPV          | sensitivity  | PPV          | sensitivity  | PPV          |
| <b>TurboFold II</b>  | <b>0.830</b> | <b>0.799</b> | <b>0.839</b> | <b>0.814</b> | <b>0.839</b> | <b>0.819</b> |
| <b>Clustal Omega</b> | 0.805        | 0.783        | 0.814        | 0.800        | 0.811        | 0.804        |
| <b>ClustalW</b>      | 0.563        | 0.534        | 0.581        | 0.558        | 0.567        | 0.554        |
| <b>LocARNA</b>       | 0.643        | 0.610        | 0.612        | 0.588        | 0.597        | 0.580        |
| <b>MXSCARNA</b>      | 0.745        | 0.729        | 0.772        | 0.762        | 0.786        | 0.780        |
| <b>ProbCons</b>      | 0.764        | 0.732        | 0.782        | 0.760        | 0.794        | 0.778        |
| <b>MAFFT</b>         | 0.794        | 0.767        | 0.818        | 0.796        | 0.828        | 0.806        |
| <b>R-Coffee</b>      | 0.582        | 0.567        | 0.624        | 0.618        | 0.618        | 0.623        |

  

| <b>SRP RNA</b>       |              |              |              |              |              |              |
|----------------------|--------------|--------------|--------------|--------------|--------------|--------------|
|                      | 5 sequences  |              | 10 sequences |              | 20 sequences |              |
|                      | sensitivity  | PPV          | sensitivity  | PPV          | sensitivity  | PPV          |
| <b>TurboFold II</b>  | 0.498        | 0.471        | 0.517        | 0.497        | 0.533        | 0.514        |
| <b>Clustal Omega</b> | 0.404        | 0.407        | 0.413        | 0.422        | 0.423        | 0.434        |
| <b>ClustalW</b>      | 0.411        | 0.384        | 0.401        | 0.377        | 0.404        | 0.381        |
| <b>LocARNA</b>       | <b>0.516</b> | 0.483        | 0.513        | 0.485        | 0.515        | 0.489        |
| <b>MXSCARNA</b>      | 0.415        | 0.411        | 0.427        | 0.434        | 0.435        | 0.448        |
| <b>ProbCons</b>      | 0.422        | 0.402        | 0.444        | 0.431        | 0.467        | 0.453        |
| <b>MAFFT</b>         | 0.505        | <b>0.486</b> | <b>0.540</b> | <b>0.522</b> | <b>0.563</b> | <b>0.544</b> |
| <b>R-Coffee</b>      | 0.427        | 0.413        | 0.453        | 0.447        | 0.473        | 0.475        |



| <b>telomerase</b>    |              |              |              |              |              |              |
|----------------------|--------------|--------------|--------------|--------------|--------------|--------------|
|                      | 5 sequences  |              | 10 sequences |              | 20 sequences |              |
|                      | sensitivity  | PPV          | sensitivity  | PPV          | sensitivity  | PPV          |
| <b>TurboFold II</b>  | <b>0.654</b> | <b>0.589</b> | <b>0.664</b> | <b>0.604</b> | <b>0.670</b> | <b>0.610</b> |
| <b>Clustal Omega</b> | 0.642        | 0.585        | 0.647        | 0.596        | 0.642        | 0.598        |
| <b>ClustalW</b>      | 0.574        | 0.508        | 0.571        | 0.509        | 0.568        | 0.510        |
| <b>LocARNA</b>       | 0.522        | 0.462        | 0.524        | 0.467        | 0.523        | 0.468        |
| <b>MXSCARNA</b>      | 0.596        | 0.549        | 0.600        | 0.560        | 0.605        | 0.569        |
| <b>ProbCons</b>      | 0.621        | 0.555        | 0.631        | 0.572        | 0.640        | 0.582        |
| <b>MAFFT</b>         | 0.632        | 0.571        | 0.649        | 0.589        | 0.660        | 0.600        |
| <b>R-Coffee</b>      | 0.618        | 0.572        | 0.623        | 0.589        | 0.626        | 0.605        |

Table S2: Structure prediction sensitivity and PPV for each method on each dataset:

| small subunit rRNA                |              |              |              |              |              |              |
|-----------------------------------|--------------|--------------|--------------|--------------|--------------|--------------|
|                                   | 5 sequences  |              | 10 sequences |              | 20 sequences |              |
|                                   | sensitivity  | PPV          | sensitivity  | PPV          | sensitivity  | PPV          |
| <b>TurboFold II</b>               | 0.632        | 0.648        | 0.645        | 0.658        | 0.649        | 0.657        |
| <b>LocARNA</b>                    | 0.605        | 0.582        | 0.622        | 0.605        | 0.604        | 0.589        |
| <b>MaxExpect</b>                  | 0.499        | 0.495        | 0.505        | 0.503        | 0.501        | 0.498        |
| <b>MXSCARNA</b>                   | <b>0.644</b> | <b>0.673</b> | <b>0.670</b> | <b>0.705</b> | <b>0.680</b> | <b>0.718</b> |
| <b>RNAalifold (Clustal Omega)</b> | 0.588        | 0.644        | 0.605        | 0.686        | 0.586        | 0.706        |
| <b>RNAalifold (ClustalW)</b>      | 0.544        | 0.603        | 0.542        | 0.650        | 0.498        | 0.680        |
| <b>RNAalifold (MAFFT)</b>         | 0.545        | 0.607        | 0.580        | 0.668        | 0.548        | 0.693        |
| <b>TurboFold</b>                  | 0.623        | 0.637        | 0.641        | 0.651        | 0.648        | 0.652        |

  

| RNase P                           |              |              |              |              |              |              |
|-----------------------------------|--------------|--------------|--------------|--------------|--------------|--------------|
|                                   | 5 sequences  |              | 10 sequences |              | 20 sequences |              |
|                                   | sensitivity  | PPV          | sensitivity  | PPV          | sensitivity  | PPV          |
| <b>TurboFold II</b>               | <b>0.792</b> | <b>0.754</b> | <b>0.815</b> | 0.761        | <b>0.823</b> | 0.763        |
| <b>LocARNA</b>                    | 0.612        | 0.587        | 0.554        | 0.600        | 0.505        | 0.614        |
| <b>MaxExpect</b>                  | 0.652        | 0.583        | 0.654        | 0.586        | 0.653        | 0.582        |
| <b>MXSCARNA</b>                   | 0.656        | 0.649        | 0.642        | 0.679        | 0.630        | 0.687        |
| <b>RNAalifold (Clustal Omega)</b> | 0.514        | 0.666        | 0.490        | 0.718        | 0.431        | 0.743        |
| <b>RNAalifold (ClustalW)</b>      | 0.452        | 0.580        | 0.400        | 0.662        | 0.333        | 0.725        |
| <b>RNAalifold (MAFFT)</b>         | 0.614        | 0.704        | 0.565        | 0.751        | 0.510        | <b>0.776</b> |
| <b>TurboFold</b>                  | 0.780        | 0.750        | 0.808        | <b>0.762</b> | 0.815        | 0.762        |

  

| SRP                               |              |              |              |              |              |              |
|-----------------------------------|--------------|--------------|--------------|--------------|--------------|--------------|
|                                   | 5 sequences  |              | 10 sequences |              | 20 sequences |              |
|                                   | sensitivity  | PPV          | sensitivity  | PPV          | sensitivity  | PPV          |
| <b>TurboFold II</b>               | <b>0.752</b> | 0.823        | <b>0.762</b> | 0.828        | <b>0.767</b> | 0.831        |
| <b>LocARNA</b>                    | 0.713        | 0.732        | 0.674        | 0.748        | 0.616        | 0.772        |
| <b>MaxExpect</b>                  | 0.665        | 0.682        | 0.654        | 0.671        | 0.657        | 0.674        |
| <b>MXSCARNA</b>                   | 0.707        | 0.703        | 0.714        | 0.722        | 0.725        | 0.736        |
| <b>RNAalifold (Clustal Omega)</b> | 0.192        | 0.671        | 0.125        | <b>0.887</b> | 0.110        | <b>0.922</b> |
| <b>RNAalifold (ClustalW)</b>      | 0.273        | 0.552        | 0.147        | 0.797        | 0.103        | 0.908        |
| <b>RNAalifold (MAFFT)</b>         | 0.490        | 0.771        | 0.383        | 0.863        | 0.320        | 0.894        |
| <b>TurboFold</b>                  | 0.736        | <b>0.824</b> | 0.751        | 0.832        | 0.760        | 0.838        |

| <b>telomerase</b>                 |              |              |              |              |              |              |
|-----------------------------------|--------------|--------------|--------------|--------------|--------------|--------------|
|                                   | 5 sequences  |              | 10 sequences |              | 20 sequences |              |
|                                   | sensitivity  | PPV          | sensitivity  | PPV          | sensitivity  | PPV          |
| <b>TurboFold II</b>               | <b>0.825</b> | 0.679        | <b>0.833</b> | 0.683        | <b>0.835</b> | 0.681        |
| <b>LocARNA</b>                    | 0.616        | 0.510        | 0.611        | 0.571        | 0.581        | 0.615        |
| <b>MaxExpect</b>                  | 0.581        | 0.433        | 0.582        | 0.434        | 0.583        | 0.434        |
| <b>MXSCARNA</b>                   | 0.652        | 0.538        | 0.703        | 0.608        | 0.712        | 0.625        |
| <b>RNAalifold (Clustal Omega)</b> | 0.489        | 0.539        | 0.357        | 0.662        | 0.268        | <b>0.811</b> |
| <b>RNAalifold (ClustalW)</b>      | 0.447        | 0.452        | 0.300        | 0.555        | 0.223        | 0.721        |
| <b>RNAalifold (MAFFT)</b>         | 0.599        | 0.584        | 0.468        | 0.671        | 0.368        | 0.776        |
| <b>TurboFold</b>                  | 0.824        | <b>0.683</b> | 0.831        | <b>0.684</b> | 0.832        | 0.681        |

## Section 6. Performance of alignment methods on BRAliBase 2.0

The benchmark of TurboFold II on BRAliBase 2.0 (11) is provided here. BraliBase 2.0 includes segments of group II introns, rRNA, SRP RNA, tRNA, and U5 RNA. The Sum of Pairs Score (SPS) is the ratio between the total number of columns in which nucleotide pairs or nucleotides aligned to a gap are identically aligned in dataset. The benchmark results of other methods are from the BRAliBase website: <http://projects.binf.ku.dk/pgardner/bralibase/bralibase2.html>.

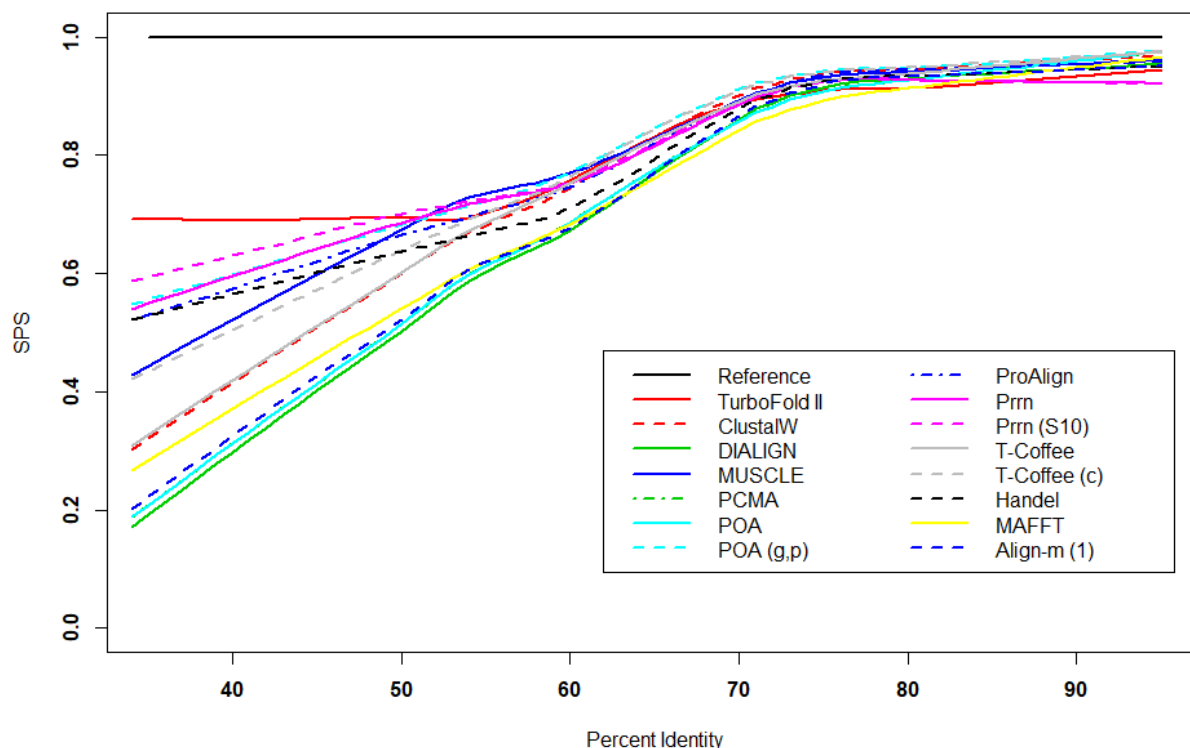

Figure S3. **The plot shows the alignment accuracy as function of the sequence identity.** The SPSs for methods other than TurboFold II are obtained from the supplementary data for BRAliBase 2.0 (11). The trend lines are plotted using LOWESS (locally weighted scatterplot smoothing) in R with the smoother span set to 0.5.

Section 6. Known and predicted structures and alignments for RNase P RNA from *Nocardioides albus*, *Propioniferax innocua*, *Salt Marsh A26*, *Mycobacterium tuberculosis*, and *Lake Griffy A #8*.

Figure S4 show the database structures for *Nocardioides albus*, *Propioniferax innocua*, *Salt Marsh A26*, *Mycobacterium tuberculosis*, and *Lake Griffy A #8* from the RNase P database (6). Figure S5 shows the database alignments for *Nocardioides albus*, *Propioniferax innocua*, *Salt Marsh A26*, *Mycobacterium tuberculosis* and *Lake Griffy A #8*. Figure S6-S11 show the predicted sequence alignments by TurboFold II, Clustal Omega, ClustalW, LocARNA and MXSCARNA and ProbCons, respectively, for this set of  $H=5$  sequences.

Figure S12-S18 show the predicted structures by TurboFold II, LocARNA, MaxExpect, MXSCARNA, RNAalifold (using Clustal Omega alignment), RNAalifold (using ClustalW alignment), and TurboFold, respectively, for this set of  $H=5$  sequences. For LocARNA, RNAalifold, and MXSCARNA, which predict consensus structure for multiple sequences, to avoid the inconsistency between the consensus structure and each sequence, the predicted structures for each sequence were generated by removing base pairing between nucleotide and insertion/deletion (gap) positions.

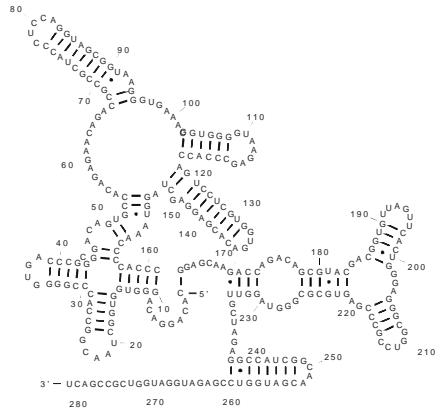

(a) *Nocardiodides albus*

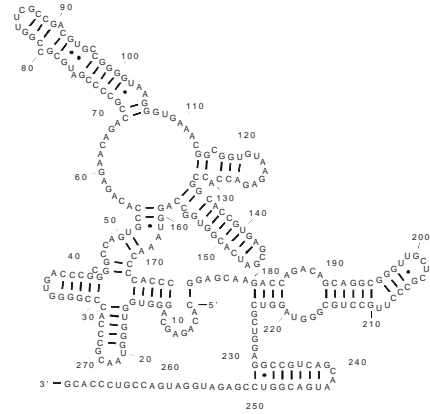

(b) *Propioniferax innocua*

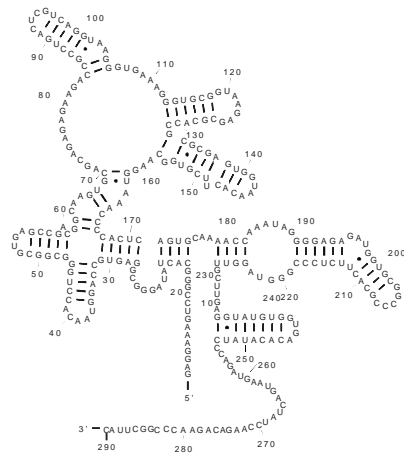

(c) Salt Marsh A26

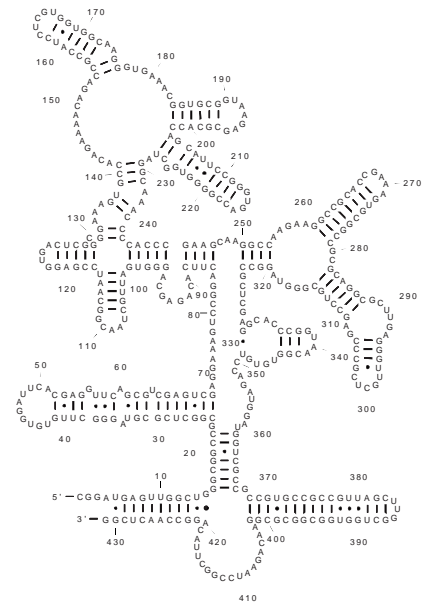

(d) *Mycobacterium tuberculosis*

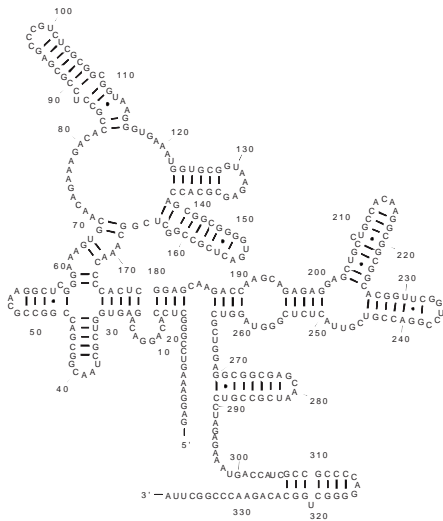

(e) Lake Griffy A #8

Figure S4. Known structures for *Nocardiodides albus*, *Propioniferax innocua*, Salt Marsh A26, *Mycobacterium tuberculosis* and Lake Griffy A #8. Known structures for *Nocardiodides albus* (a),

*Propioniferax innocua* (b), *Salt Marsh A26* (c), *Mycobacterium tuberculosis* (d) and *Lake Griffy A #8* (e) from the RNase P database (6). 5' and 3' ends of sequences are indicated by "5'" and "3'". A heavy line between two nucleotides indicates the base pairing interaction between the nucleotides.

|                |                                                               |
|----------------|---------------------------------------------------------------|
| N.albus        | -----                                                         |
| SM-A26         | -----                                                         |
| M.tuberculosis | CGGAUGAGUUGGCUGGGCGGCCGCGCUCGCGUAGGGCUUGUGUGGAUUCACGAGGUUCA   |
| LGA8           | -----                                                         |
| P.innocua      | -----                                                         |
|                |                                                               |
| N.albus        | -----CACAGGACAGGGUGGUGGCUAACGGCCACCCGG                        |
| SM-A26         | -----gaggaaagucCGGGCACUAUAGGGCGGAGUGCCAGGUAACACCUUGGGCGG      |
| M.tuberculosis | GCGUCGAGUCGAGGAAAGUCCGGACUUCACAGAGCAGGGUGAUUGCUAACGGCAAUCCGA  |
| LGA8           | -----gaggaaaguccgggUCCACAGGACAGAGUGGUCGCUAACGGCGACCCGG        |
| P.innocua      | -----CACAGAGCAGGGUGGUGGGUAACGCCACCCGG                         |
|                |                                                               |
| N.albus        | GGUGACCCGCGGGACAGUGCCACAGAGAACAGA-CCGCCGUACC-----CUCCA----    |
| SM-A26         | CGUGAGCCGACGGCAAGUGCAGCAGAGAGAAG-ACCGCCUGA-----CUCG----       |
| M.tuberculosis | GGUGACUCGCGGGAAAGUGCCACAGAAAACAG-ACCGCAUC-----CUCGU----       |
| LGA8           | CGCAAGGCUCGGGAAAGUGCAACAGAAAAGAC--ACCGCCUCCGCGAG----CCCUG---- |
| P.innocua      | GGUGACCCGCGGGCCAGUGCCACAGAGAACAGA-CCGCCCGAUGC GCCGG-UUCGCCGA  |
|                |                                                               |
| N.albus        | --GGUAGCGGUAAGGGUGAAACGGUGGGGUAAGAGCCACCAGUCCUCGUGGUGACAC-G   |
| SM-A26         | -----UCAGGUAAGGGUGAAAGGGUGCGGUAAGAGCGCACC-GCGCGAGUGGUAACACUU  |
| M.tuberculosis | -----GGUGGCAAGGGUGAAACGGUGCGGUAAGAGCGCACCAGCAUUCGGGUGACCG-G   |
| LGA8           | CUCGCGGCGGUAAGGGUGAAUUGGUGCGGUAAGAGCGCACCAGCGGCGGG-GUGA-CU-C  |
| P.innocua      | CGUGCCGGGGUAAGGGUGAAACGGCGGUGUAAGAGACCACCGGCACCGUGAGCGAUCA-C  |
|                |                                                               |
| N.albus        | AGGAGCU-AGGUAAACCCACCCGGAGCAAGACCAGAC-----                    |
| SM-A26         | CGUGGC-AAGGUAAACCCACUCAGUGCAAAACCAAU-----                     |
| M.tuberculosis | GGUGGCU-AGGCAAACCCACCCGAAGCAAGGCCAAGAAGGCCGCACCGAAAGUGCGGCC   |
| LGA8           | GCCGGCU-CGGCAAACCCACUCGGAGCAAGACCAAG-----                     |
| P.innocua      | GGUGGCC-AGGUAAACCCACCCGGAGCAAGACCAGAC-----                    |
|                |                                                               |
| N.albus        | -AGCGUACGACGGUG-----UUAGUU-----CACUGGG--AGGGCGGUCCGCCGA-----  |
| SM-A26         | AGGGGAGAGA-----U--GGUGCGGCCCGCACU-----                        |
| M.tuberculosis | GCGCAGGCGC-----UU-GAGGGUUGCUCGCCGA-----                       |
| LGA8           | CAGAGAG-GAGCUGCCUGCC-ACAA-GGCGGCGGC--ACGGUUCGGUCCGGACCGUCGUU  |
| P.innocua      | -AGCAGGC-----GGGUUGCUCGCC-----U                               |
|                |                                                               |
| N.albus        | -GUGCGGGUAGGUUGCUGAGAGGCCAUCGGCAACGAUGGUCCGAGAUGGAUGGUCGCCG   |
| SM-A26         | -UCUCCGGGUAGGUUGCUGAGGUAUGUGGUGACACAUAUCCAGAUAAUGACUAUCC      |
| M.tuberculosis | -GCCUGCGGGUAGGCCGUCGAGGCCACCCGGUAACGGUGUGUCCAGAUUGGAUGGUCGCC- |
| LGA8           | A-CUCUCGGGUAGGUCGUGGAGGCCGCGAGCAAUCGCCGUCCUAGAGAAAUGACCAUC-   |
| P.innocua      | UGCCUGCGGGUAGGUCGUGGAGGCCGUCAGCAAUGACGGUCCGAGAUGGAUGACCGUCC   |
|                |                                                               |
| N.albus        | A-----CU-----                                                 |
| SM-A26         | A-----AGacagaaccggcuuac-                                      |
| M.tuberculosis | --GCCGUGCCCGGUUAGCUUG-GCUgUGGCGGCGC-GGA--ACAGAAUCCGGCUUACA    |
| LGA8           | --GCCGCCC-----CAG-----GGGCUGGC--acagaaccggcuua--              |
| P.innocua      | CA-----CG-----                                                |
|                |                                                               |
| N.albus        | -----                                                         |
| SM-A26         | -----                                                         |
| M.tuberculosis | GGCCAACUCGUCCG                                                |
| LGA8           | -----                                                         |
| P.innocua      | -----                                                         |

Figure S5. Database alignments for *Nocardioides albus*, *Propioniferax innocua*, *Salt Marsh A26*, *Mycobacterium tuberculosis* and *Lake Griffy A #8*.



|                 |                                                               |
|-----------------|---------------------------------------------------------------|
| N. albus        | -----                                                         |
| SM-A26(42)      | -GA-----                                                      |
| M. tuberculosis | CGGAUGAGUUGGCUUGGGCGGCCGCGGCUCGCGUAGGGCUUGUGUGGAUUCACGAGGUUCA |
| LGA8            | GA-----                                                       |
| P. innocua      | -----                                                         |
|                 |                                                               |
| N. albus        | -----CACAGGACAGGGUGGUGGCUAACGGCCACCCG                         |
| SM-A26(42)      | -----GGAAAGUCCGGGCACUUAU-AGGGCGGAGUGCCAGGUAACACCUUGGGCG       |
| M. tuberculosis | GCGUCGAGUCGAGGAAAGUCCGGACUUCAC-AGAGCAGGGUGAUUGCUAACGGCAAUCCG  |
| LGA8            | -----GGAAAGUCCGGGCUCCAC-AGGACAGAGUGGUCGCUAACGGCGACCCG         |
| P. innocua      | -----CAC--AGAGCAGGGUGGUGGGUAACGCCACCCG                        |
|                 |                                                               |
| N. albus        | GGGUGACCCGCGGGACAGUGCCACAGAGAACAGACCGCCGCUAC-----CCUCCA----   |
| SM-A26(42)      | GCGUGAGCCGACGGCAAGUGCAGCAGAGAGAAGACCGCCUG-----ACUCGU----      |
| M. tuberculosis | AGGUGACUCGCGGGAAAGUGCCACAGAAAACAGACCGCCAU-----CCUCGU----      |
| LGA8            | CCGCAAGGCUCGGGAAAGUGCAACAGAAA-GACACCGCCUCCGC----GAGCCCGU---C  |
| P. innocua      | GGGUGACCCGCGGGCCAGUGCCACAGAGAACAGACCGCCCGAUUGC GCCGGUUCGCCGAC |
|                 |                                                               |
| N. albus        | -GGUAGCGGUAAGGGUGAAACGGUGGGGUAAGAGCCCACCAGUCCUGUGGUGACAC-GA   |
| SM-A26(42)      | -----CAGGUAAGGGUGAAAGGGUGCGGUAAGAGCGCACCGCGC-AGUGGUAACACUUC   |
| M. tuberculosis | ----GGUGGCAAGGGUGAAACGGUGCGGUAAGAGCGCACCCAGCAUUCGGGUGACCG-GG  |
| LGA8            | UCGCGGCGGUAAGGGUGAAUUGGUGCGGUAAGAGCGCACCCAGCGG-CGGGUGACUC--G  |
| P. innocua      | GUGCCGGGUAAGGGUGAAACGGCGGUGUAAGAGACCACCGGCACCUGAGCGAUCA-CG    |
|                 |                                                               |
| N. albus        | GGAGCUAGGUAAACCCACCCGAGCAAGACCAGACAGCGUACGACG----GUGUUAGUU    |
| SM-A26(42)      | GUGGCAAGGUAAACCCACUCAGUGCAAAACCAAUAGGGGAGAG-----              |
| M. tuberculosis | GUGGCUAGGCAAACCCACCCGAAGCAAGGCCAAGAAGGCCGCA-----CCGAAAGUG     |
| LGA8            | CCGGCUCGGCAAACCCACUCGAGCAAGACCAAGCAGAGAGGAGCUGCCUGCCACAAGG    |
| P. innocua      | GUGGCCAGGUAAACCCACCCGAGCAAGACCAGACAGCAGGC-----                |
|                 |                                                               |
| N. albus        | CACUGGGA-----GGGCGGUCCGCC-----GAGUGCGCGGGUAGGUUGCUAGA         |
| SM-A26(42)      | -----AUG-----GUGCGGCCGCAC-----U-UCUCCGGGUAGGUUGCUUGA          |
| M. tuberculosis | CGGCCGCGCAGGCGCUUGAGGGUUGCUCGCC-----GAGCCUGCGGGUAGGCCGCUCGA   |
| LGA8            | CGGCGGCACG-----GUUCGGUCCGGACCGUCGUUACUCUGGGUAGGUUCGUGGA       |
| P. innocua      | -----GGGUUGCUCGCC-----UUGCCUGCGGGUAGGUUCGUGGA                 |
|                 |                                                               |
| N. albus        | GGCCAUCGGCAACGAUGGUCCGAGAUGGAUGGUCGCCG-----                   |
| SM-A26(42)      | GGU AUGUGGUGACACAUUCCAGAU GAAUGACUAUCC-----                   |
| M. tuberculosis | GGCACCCGGUAACGGUGUGUCCAGAU GGAUGGUCGCCGCCGUGCCGCCGUUAGCUUGGCU |
| LGA8            | GGCGGCGAGCAAUCGCCGUCCUAGAGAAAUGACCAUCGCCGCC-----AG---         |
| P. innocua      | GGCCGUCAGCAAUGACGGUCCGAGAUGGAUGACCGUCC-----                   |
|                 |                                                               |
| N. albus        | -----A-----CU                                                 |
| SM-A26(42)      | -----AAGACAGAACCCGGCUU-----AC                                 |
| M. tuberculosis | GGUGGCGGCGCGGAACAGAAUCCGGCUUACAGGCCAACUCGUCCG                 |
| LGA8            | -----GGGCUGGCACAGAACCCGGCUU-----A                             |
| P. innocua      | -----CA-----CG                                                |

Figure S6. Predicted alignments by TurboFold II for *Nocardioides albus*, *Propioniferax innocua*, *Salt Marsh A26*, *Mycobacterium tuberculosis* and *Lake Griffy A #8*.

```

N.albus -----
SM-A26 -----
M.tuberculosis CGGAUGAGUJUGGUCGGGCGGCCGCGCUCGCGUAGGGCUUGUGUGGAUUCACGAGGUUCA
LGA8 -----
P.innocua -----

N.albus -----CACAGGACAGGGUGGUGGCUAACGGCCACCCGG
SM-A26 -----GAGGAAAGUCCGGGCACUUAUAGGGCGGAGUGCCAGGUAACACCUGGGCGG
M.tuberculosis GCGUCGAGUCGAGGAAAGUCCGGACUUCACAGAGCAGGGUGAUUGCUAACGGCAAUCCGA
LGA8 -----GAGGAAAGUCCGGGCUCACAGGACAGAGUGGUCGCUAACGGCGACCCGGC
P.innocua -----CACAGAGCAGGGUGGUGGGUAACGCCACCCGG

N.albus GGUGACCCGCGGGACAGUGCCACAGAGAACAGACCGCCGCUACCCUCCAGGU-----
SM-A26 CGUGAGCCGACGGCAAGUGCAGCAGAGAGAAGACCGCCUGACUC---G-----
M.tuberculosis GGUGACUCGCGGGAAAGUGCCACAGAAAACAGACCGCC---AUCCUCGU-----
LGA8 CGCAAGGCUCGGGAAAGUGCAACAGAAA-GACACCGCCUCCGC---G---AGCCCGUCU
P.innocua GGUGACCCGCGGGCCAGUGCCACAGAGAACAGACCGCCCCGAUGCGCCGGUUCGCCGACG

N.albus ---AGCGGUAAGGGUGAAACGGUGGGGUAAGAGCCCACCAGUCCUCGUGGUGACAC-GAG
SM-A26 ---UCAGGUAAGGGUGAAAGGGUGCGGUAAGAGCGCACCGCGCGAG-UGGUAACACUUCG
M.tuberculosis ---GGUGGCAAGGGUGAAACGGUGCGGUAAGAGCGCACCCAGCAUUCGGGUGACCG-GGG
LGA8 CGCGGCGGUAAGGGUGAAAUGGUGCGGUAAGAGCGCACCCAGCGGCG-GGGUGACUC--GC
P.innocua UGCCGGGGUAAGGGUGAAACGGCGGUGUAAGAGACCACCGGCACCGUGAGCGAUCA-CGG

N.albus GAGCUAGGUA AACCCACCCGGAGCAAGACCAGACAGCGUAC-----GACGGUGU
SM-A26 UGGCAAGGUA AACCCACUCAGUGCAAAACCAAUAGGGGAGAGAUG-----
M.tuberculosis UGGCUAGGCAAACCCACCCGAAGCAAGGCCAAGAAGGCCGACCC-----GAAAGUGC
LGA8 CGGCUCGGCAAACCCACUCGGAGCAAGACCAAGCAGAGAGGAGCUGCCUCCACAAGGC
P.innocua UGGCCAGGUA AACCCACCCGGAGCAAGACCAGACAGCAGGC-----G-----

N.albus UAGUUCA-----CUGGGAGGGCGGUCCGCCCGAGUGCGCGGGUAGGUUJGCUAGAGGCCAU
SM-A26 -----GUGCGGCCCGCACUU-CUCCCGGGUAGGUUJGCUUAGAGGUUAG
M.tuberculosis GGCCGCGCAGGCGCUUGAGGGUJGUCGCCCCGAGCCUGCGGGUAGGCCGUCGAGGCCACC
LGA8 GCGCGCACGG---UUCGGUCCGACCGUCGUUACUCUGGGUAGGUCGCUAGAGGCCGCG
P.innocua -----GGUJGUCGCCCCUUGCCUGCGGGUAGGUCGCUAGAGGCCGCU

N.albus CGGCAACGAUGGUCCGAGAUGGAUGGUCGCCGACU-----
SM-A26 UGGUGACACAUAUCCAGAUGAAUGACUAUCCA-----
M.tuberculosis CGGUAACGGUGUGUCCAGAUGGAUGGUCGCCGCCGUGCCGCCGUUAGCUUGGCUUGGUGG
LGA8 GAGCAAUCGCCGUCCUAGAGAAAUGACCAUCGCCGCCCCAG-----
P.innocua CAGCAAUGACGGUCCGAGAUGGAUGACCGUCCACG-----

N.albus -----
SM-A26 -----AGACAGAACCCGGCUUAC-----
M.tuberculosis GGC GCGGAACAGAAUCCGGCUUACAGGCCAACUCGUCCG
LGA8 GGGCUGGCACAGAACCCGGCUUA-----
P.innocua -----

```

Figure S7. Predicted alignments by Clustal Omega for *Nocardioides albus*, *Propioniferax innocua*, *Salt Marsh A26*, *Mycobacterium tuberculosis* and *Lake Griffy A #8*.

|                |                                                               |
|----------------|---------------------------------------------------------------|
| N.albus        | -----                                                         |
| M.tuberculosis | CGGAUGAGUUGGCUGGGCGGCCGCGGCUCGCGUAGGGCUUGUGUGGAUUCACGAGGUUCA  |
| P.innocua      | -----                                                         |
| SM-A26         | -----                                                         |
| LGA8           | -----                                                         |
|                |                                                               |
| N.albus        | -----CACAGGACAGGGUGGUGGCUAACGGCCACCCGG                        |
| M.tuberculosis | GCGUCGAGUCGAGGAAAGUCCGGACUUCACAGAGCAGGGUGAUUGCUAACGGCAAUCCGA  |
| P.innocua      | -----CACAGAGCAGGGUGGUGGGUAACGCCACCCGG                         |
| SM-A26         | -----GAGGAAAGUCCGGGCACUAUAGGGCGGAGUGCCAGGUAACACCUGGGCGG       |
| LGA8           | -----GAGGAAAGUCCGGGCUCACAGGACAGAGUGGUCGCUAACGGCGACCCGG        |
|                |                                                               |
| N.albus        | GGUGACCCGCGGGACAGUGCCACAGAGAACAGACCGCCGCUACCCUCCAG-----       |
| M.tuberculosis | GGUGACUCGCGGGAAAGUGCCACAGAAAACAGACCGCC---AUCCUC-----          |
| P.innocua      | GGUGACCCGCGGGCCAGUGCCACAGAGAACAGACCGCCCGAUGC GCCGGUUCGCCGACG  |
| SM-A26         | CGUGAGCCGACGGCAAGUGCAGCAGAGAGAAGACCGCCU----GACUCGUCA-----     |
| LGA8           | CGCAAGGCUCGGGAAAGUGCAACAGAAAAGAC-ACCGCCUCCGCGAGCCCGUCUC-----  |
|                |                                                               |
| N.albus        | -GUAGCGGUAAGGGUGAAACGGUGGGGUAAGAGCCCACCAGUCCUCGUGGUGACACGAGG  |
| M.tuberculosis | -GUGGUGGCAAGGGUGAAACGGUGCGGUAAGAGCGCACCAGCAUUCGGGUGACCGGGGU   |
| P.innocua      | UGCCGGGGUAAGGGUGAAACGGCGGUGUAAGAGACCACCGGCACCGUGAGCGAUACGGU   |
| SM-A26         | -----GGUAAGGGUGAAAGGGUGCGGUAAGAGCGCACCAGCGGAGUGGUAACACUUCGU   |
| LGA8           | -GCGGCGGUAAGGGUGAAAUGGUGCGGUAAGAGCGCACCAGCGGCGGGGUGACUCGCCG-  |
|                |                                                               |
| N.albus        | AGCUAGGUA AACCCACCCGAGCAAGACCAGACAG--CGUAC-GACGGUGUJAGUUCAC   |
| M.tuberculosis | GGCUAGGCAAACCCACCCGAAGCAAGGCCAAGAAGGCCGACCGAAAGUCGGCCGCGC     |
| P.innocua      | GGCCAGGUA AACCCACCCGAGCAAGACCAGACAG-----C                     |
| SM-A26         | GGCAAGGUA AACCCACUCAGUGCAAACCAAUAGG--GGAGAG-----              |
| LGA8           | -GCUCGGCAAACCCACUCGGAGCAAGACCAAGCAGA--GAGGAGCUGCCUGCCACAAGG   |
|                |                                                               |
| N.albus        | UGG-----GAGGGCGGUCCGCC-----GAGUGCGCGGGUAGGUUGCUAGAGGCCAUCCG   |
| M.tuberculosis | AGGCGCUUGAGGGUUGCUCGCC-----GAGCCUGCGGGUAGGCCGCUAGGCCACCCGG    |
| P.innocua      | AGGC-----GGGUUGCUCGCC-----UUGCCUGCGGGUAGGUCGCUAGGAGGCCGUCAG   |
| SM-A26         | -----AUGGUGCGGCCCGCAC-----UUCUCCGGGUAGGUUGCUUGAGGUAUUGG       |
| LGA8           | CGGCGGCACGGUUCGGUCCGGACCGUCGUUACUCUGGGUAGGUCGCUAGGAGGCCGGCGAG |
|                |                                                               |
| N.albus        | CAACGAUGGUCCGAGAUUGGAUGGUCGCCGACU-----                        |
| M.tuberculosis | UAACGGUGUGUCCAGAUUGGAUGGUCGCCGUGCCGCGGUAGCUUGGCUGGUGGCGGC     |
| P.innocua      | CAAUGACGGUCCGAGAUUGAUGACCGUC-CCACG-----                       |
| SM-A26         | UGACACAUAUCCAGAUAAUGACUAUC-----CAAG-----ACAGAACCCGGCUU        |
| LGA8           | CAAUCGCCGUCCUAGAGAAUGACCAUCGCCGCCCCAGGGGCUGGCACAGAACCCGGCUU   |
|                |                                                               |
| N.albus        | -----                                                         |
| M.tuberculosis | GCGGAACAGAAUCCGGCUUACAGGCCAACUCGUCCG                          |
| P.innocua      | -----                                                         |
| SM-A26         | AC-----                                                       |
| LGA8           | A-----                                                        |

Figure S8. Predicted alignments by ClustalW for *Nocardioides albus*, *Propioniferax innocua*, *Salt Marsh A26*, *Mycobacterium tuberculosis* and *Lake Griffy A #8*.

|                |                                                               |
|----------------|---------------------------------------------------------------|
| SM-A26         | GAGGAAAGUCCGGGCACUUAUAG--GGCGGAGU--GCCAGG-----UAACACCUGGGC    |
| LGA8           | GAGGAAAGUCCGGGCUCCACAG--GACAGAGU--GGUCGC-----UAACGGCGACCG     |
| N.albus        | -----CACAG--GACAGGGU--GGUGGC-----UAACGGCCACCC                 |
| P.innocua      | -----CACAG--AGCAGGGU--GGUGGG-----UAACGCCACCC                  |
| M.tuberculosis | CGGAUGAGUUGGCUGGGCGGCCGCGGCUCGCGUAGGGCUUGUGUGGAUUCACGAGGUUCA  |
|                |                                                               |
| SM-A26         | GGCGUGAGCC---GACGGCAAGUGCAGCAGAGAG-AA-----GAC----CGCCUGAC-    |
| LGA8           | GCCGCAAGGC---UCGGGAAAGUGCAACAGAAAG-AC-----ACCGCCUCCGCGAGC-    |
| N.albus        | GGGGUGACCC---GCGGGACAGUGCCACAGAGAACAG-----ACCGCCGUACCCUC-     |
| P.innocua      | GGGGUGACCC---GCGGGCCAGUGCCACAGAGAACAG-----ACCGCCCCGAUGCGCC    |
| M.tuberculosis | GCGUCGAGUCGAGGAAAGUCCGGACUUCACAGAGCAGGGUGAUUGCUAACGGCAAUCCGA  |
|                |                                                               |
| SM-A26         | -----UCG-UCA---GGU-----AAGGGUGA                               |
| LGA8           | -----CCGUCUC---GCGGC-----GGUAAGGGUGA                          |
| N.albus        | -----CAG---GUAGC-----GGUAAGGGUGA                              |
| P.innocua      | GGUUCGCCGACGU---GCCGG-----GGUAAGGGUGA                         |
| M.tuberculosis | GGUGACUCGCGGGAAAGUGCCACAGAAAACAGACCGCCAUCCUCGUGGUGGCAAGGGUGA  |
|                |                                                               |
| SM-A26         | AAGGGUGCGGUAAGAGCGCACCCGCGCG-AGUGGUAACACUUCGUGGCAAGGUAACCCCA  |
| LGA8           | AAUGGUGCGGUAAGAGCGCACCCGCGG-CGGGGUGACUCG-CCGGCU-CGGCAAACCCCA  |
| N.albus        | AACGGUGGGGUAAGAGCCCACAGUCCUCGUGGUGACACGAGGAGCU-AGGUAACCCCA    |
| P.innocua      | AACGGCGGUGUAAGAGACCACCGGCACCGUGAGCGAUCACGGUGGCC-AGGUAACCCCA   |
| M.tuberculosis | AACGGUGCGGUAAGAGCGCACCCAGCAUUCGGGUGACCGGGUGGCCU-AGGCAAACCCCA  |
|                |                                                               |
| SM-A26         | CUCAGUGCAAAACCAAUAGGGGAGAG-----AUGGUGCGGCC                    |
| LGA8           | CUCGGAGCAAGACCAAGCAGAGAGGAGCUGCCUGCCACAAGGCGGCGGCACGGUUCGGUC  |
| N.albus        | CCCGGAGCAAGACCAGACAGCGUACGACGGUGUU-----AGUUCACUG-GGAGGGCGGUC  |
| P.innocua      | CCCGGAGCAAGACCAGACAGCAGGC-----GGGUUGCU                        |
| M.tuberculosis | CCCGAAGCAAGGCCAAGAAGGCCGACCGAAAGUGCGGCCGCGCAGGC-GCUUGAGGGUU   |
|                |                                                               |
| SM-A26         | CGCACU-----UCUCCC-GGGUAGGUUGCUUGAGGUAUGUGGUGACAC-AUAUCCAGAU   |
| LGA8           | CGGACCGUCGUUACUCUCGGGUAGGUCGCUGGAGGCGGCGAGCAAUCG-CCGUCCUAGAG  |
| N.albus        | CGCCCC-----AGUGC GCGGGUAGGUUGCUAGAGGCCAUCGGCAACGA-UGGUCCGAGAU |
| P.innocua      | CGCCCU-----UGCCUGCGGGUAGGUCGCUGGAGGCCGUCAGCAAUGA-CGGUCCGAGAU  |
| M.tuberculosis | GCUCGCCCCGAGCCUGC--GGGUAGGCCGUCGAGGCACCCGGUAACGGUGUGUCC-AGAU  |
|                |                                                               |
| SM-A26         | GAAUGACUUAU-----CCAAG-----ACAGAACCCGGC                        |
| LGA8           | AAAUGACCAUCGCC-----GCCCCAGGGGC-----UGGCACAGAACCCGGC           |
| N.albus        | GGAUGGUCG-----CCGAC                                           |
| P.innocua      | GGAUGACCGU-----CCCAC                                          |
| M.tuberculosis | GGAUGGUCGCCGCCGUGCCGCCGUUAGCUUGGCUGGUGGCGGCGGGAACAGAAUCCGGC   |
|                |                                                               |
| SM-A26         | UUAC-----                                                     |
| LGA8           | UUA-----                                                      |
| N.albus        | U-----                                                        |
| P.innocua      | G-----                                                        |
| M.tuberculosis | UUACAGGCCAACUCGUCCG                                           |

Figure S9. Predicted alignments by LocARNA for *Nocardioides albus*, *Propioniferax innocua*, *Salt Marsh A26*, *Mycobacterium tuberculosis* and *Lake Griffy A #8*.

|                |                                                                |
|----------------|----------------------------------------------------------------|
| N.albus        | CACA-----                                                      |
| SM-A26         | GA-----                                                        |
| M.tuberculosis | CGGAUGAGUUGGCUGGGCGGCCGCGGCUCGCGUAGGGCUUGUGUGGAUUCACGAGGUUCA   |
| LGA8           | GA-----                                                        |
| P.innocua      | C-----                                                         |
|                |                                                                |
| N.albus        | -----GGACAGGGUGGUGGCUAACGGCCACCCGG                             |
| SM-A26         | -----GGAAAGUCCGGGCACUAUAGGGCGGAGUGCCAGGUAACACCUUGGGCGG         |
| M.tuberculosis | GCGUCGAGUCGAGGAAAGUCCGGACUUCACAGAGCAGGGUGAUUGCUAACGGCAAUCCGA   |
| LGA8           | -----GGAAAGUCCGGGCUCCACAGGACAGAGUGGUCGCUAACGGCGACCCGGC         |
| P.innocua      | -----ACAGAGCAGGGUGGUGGGUAACGCCACCCGG                           |
|                |                                                                |
| N.albus        | GGUGACCCGCGGGACAGUGCCACAGAGAACAGACCGCCGCU---AC--C---C---UCC    |
| SM-A26         | CGUGAGCCGACGGCAAGUGCAGCAGAGAGAAGACCGCC-----UGACU---C---GUC     |
| M.tuberculosis | GGUGACUCGCGGGAAAGUGCCACAGAAAACAGACCGCC-----AU--C---C---UCG     |
| LGA8           | CGCAAGGCUCGGGAAAGUGCAACAGAAAG-ACACCGCCUCCGCGAG-CC---C---GUC    |
| P.innocua      | GGUGACCCGCGGGCCAGUGCCACAGAGAACAGACCGCCCCGAUGCG-CCGGUUCGCCGAC   |
|                |                                                                |
| N.albus        | AGGUAGCGGUAAGGGUGAAACGGUGGGGUAAGAGCCCACCAGUCCUCG-UGGUGAC-ACG   |
| SM-A26         | -----AGGUAAGGGUGAAAGGGUGCGGUAAGAGCGCACCCGCGCG-AG-UGGUAAC-ACU   |
| M.tuberculosis | UG---GUGGCAAGGGUGAAACGGUGCGGUAAGAGCGCACCCAGCAUUC-GGGUGAC-CGG   |
| LGA8           | UCGCGGGCGGUAAGGGUGAAUUGGUGCGGUAAGAGCGCACCCAGCGG-CG-GGGUGAC-UCG |
| P.innocua      | GUGCCGGGGUAAGGGUGAAACGGCGGUGUAAGAGACCACCGGCAC-CGUGAGCGAUCACG   |
|                |                                                                |
| N.albus        | -AGGAGCUAGGUAACCCACCCGAGCAAGACCAGACAGC--GUA-CG--ACGGUGUU       |
| SM-A26         | UCGUGGCAAGGUAACCCACUCAGUGCAAACCAAUAGG--GGAGAG-----             |
| M.tuberculosis | -GGUGGCUAGGCAAACCCACCCGAAGCAAGGCCAAGAAGGCCGACCG--AAAGUGCG      |
| LGA8           | --CCGGCUCGGCAAACCCACUCGGAGCAAGACCAAGCAGA--GAGGAGCUGCCUGCCAC    |
| P.innocua      | --GUGGCCAGGUAACCCACCCGAGCAAGACCAGACAGC--AGGCGG-----            |
|                |                                                                |
| N.albus        | AGUUC--ACUGG-----GAGG--GCGGUCCG-----CCGAGUGCGCGGGUAGGUUGCUA    |
| SM-A26         | -----AUGGUGCGGCCCGCA-----CUUCUCCGGGUAGGUUGCUU                  |
| M.tuberculosis | GCCGC--GCAGGCGCUUGAGG--GUUGCUCG-----CCGAGCCUGCGGGUAGGCCGCUC    |
| LGA8           | A--AGGCGGCGG----CACGGUUCGGUCCGGACCUCGUUACUCUGGGUAGGUCGCUG      |
| P.innocua      | -----G--UUGCUCG-----CCCUUGCCUGCGGGUAGGUCGCUG                   |
|                |                                                                |
| N.albus        | GAGGCCAUCGGCAACGAUGGUCCGAGAUGGAUGGUCGC-----                    |
| SM-A26         | GAGGUAUGUGGUGACACAUAUCCAGAUGAAUGACUAUC-----C-----A-----        |
| M.tuberculosis | GAGGCACCCGGUAACGGUGUGUCCAGAUGGAUGGUCGCCGCCGUGCCGCCGUUAGCUUGG   |
| LGA8           | GAGGCGGCGAGCAAUCGCCGUCCUAGAGAAAUGACCAUCGCCGCCCC-----AG--GGG    |
| P.innocua      | GAGGCCGUCAGCAAUGACGGUCCGAGAUGGAUGACCUC-----C-----              |
|                |                                                                |
| N.albus        | -----C-G-----ACU                                               |
| SM-A26         | -----AGACAGAACCCGGCU-----UAC                                   |
| M.tuberculosis | CUGGUGGCGGCGCGGAACAGAAUCCGGCUUACAGGCCAACUCGUCCG                |
| LGA8           | C-----UGGCACAGAACCCGGCU-----U-A                                |
| P.innocua      | -----C-----ACG                                                 |

Figure S10. Predicted alignments by MXSCARNA for *Nocardioides albus*, *Propioniferax innocua*, *Salt Marsh A26*, *Mycobacterium tuberculosis* and *Lake Griffy A #8*.

|                |                                                           |
|----------------|-----------------------------------------------------------|
| N.albus        | -----                                                     |
| SM-A26         | -----                                                     |
| M.tuberculosis | CGGAUGAGUUGGCUGGGCGGCCGCGGCUCGCGUAGGGCUUGUGUGGAUUCACGAGG  |
| LGA8           | -----                                                     |
| P.innocua      | -----                                                     |
|                |                                                           |
| N.albus        | -----CAC---AGGACAGGGUGGUGGCUAACGGC                        |
| SM-A26         | -----GAGGAAAGUCCGGG---CACUAUAGGGCGGAGUGCCAGGUAACACC       |
| M.tuberculosis | GCGUCGAGUCGAGGAAAGUCCGGACUUCAC---AGAGCAGGGUGAUUGCUAACGGC  |
| LGA8           | -----GAGGAAAGUCCGGGCUCCAC---AGGACAGAGUGGUCGCUAACGGC       |
| P.innocua      | -----CAC---AGAGCAGGGUGGUGGGUAACGCC                        |
|                |                                                           |
| N.albus        | CCGGGGUGACCCG-----CGGGACAGUGCCACAGAGAACAGACCCGCC--G--CU   |
| SM-A26         | GCGGCGUGAGCCG-----ACGGCAAGUGCAGCAGAGAGAAGACCCGCC-UG----   |
| M.tuberculosis | CCGAGGUGACUCG-----CGGGAAAGUGCCACAGAAAACAGACCCGCAUCC---    |
| LGA8           | CCGG-----CCGCAAGGCUCGGGAAAGUGCAACAGAAAG-ACACCCGCC-UCCGC-  |
| P.innocua      | CCGGGGUGACCCG-----CGGGCCAGUGCCACAGAGAACAGACCCGCC--CCGAU   |
|                |                                                           |
| N.albus        | -C--CUCCAG----GUAG--CGGUAAGGGUGAAACGGUGGGG--UAAGAGCCCACC  |
| SM-A26         | ----CUCGUC-----AGGUAAGGGUGAAAGGGUGCGG--UAAGAGCGCACC       |
| M.tuberculosis | ----UCGUG----GUGG--C---AAGGGUGAAACGGUGCGG--UAAGAGCGCACC   |
| LGA8           | CCGUCUCG-C-----GG--CGGUAAGGGUGAAAUGGUGCGG--UAAGAGCGCACC   |
| P.innocua      | CGGU-UCG-CCGACGUGCCGGGUAAGGGUGAAACG--GCGGUGUAAGAGACCACC   |
|                |                                                           |
| N.albus        | CU--CG--UGGUGAC-A--CGA--GG-AGCUA-GGUAACCCCACCCGGAGCAAGA   |
| SM-A26         | G---CGAGUGGUAAC-----ACUUCGUGGC-AAGGUAACCCCACUCAGUGCAAAA   |
| M.tuberculosis | AUJCCG---GGUGAC---CGG--GGUGGCUA-GGCAAACCCCACCCGAAGCAAGG   |
| LGA8           | G--GCGG--GGUGAC---UCGC--C--GGCUC-GGCAAACCCCACUCGGAGCAAGA  |
| P.innocua      | A--CCG-----UGAGCGAUCAC--GGUGGC-CAGGUAACCCCACCCGGAGCAAGA   |
|                |                                                           |
| N.albus        | A-CAGC-----GUACGACGGUGUAGUUCACUGGGAGGGCG-----             |
| SM-A26         | AUAGGGG-A---GAGAUG-GUG-----CG-----                        |
| M.tuberculosis | G-AAGGCCGCACCGAAA--GUGCGGCC-----GCGCAGGCGCUUGAG           |
| LGA8           | G-CAGAGAG---GAGCUGCCUGCCAC-----AAGGCG-----                |
| P.innocua      | A-CAGC-----AGGCG-----                                     |
|                |                                                           |
| N.albus        | -C-CGCCC-----GAG-----UGC GCGGGUAGGUUGCUAGAG--             |
| SM-A26         | ----GCC-----GCAC-----U--UCU-CCCGGUAGGUUGCUUGAGGU          |
| M.tuberculosis | GCUCGCC-----GAGC-----CU--GCGGGUAGGCCCGCUCGAG--            |
| LGA8           | -C-GGCACGGUUCGGUCCGGACCGUCGUUACUCU--CGGGUAGGUCGUGGAG--    |
| P.innocua      | GCUCGCC--U-----UGC-----CU--GCGGGUAGGUCGUGGAG--            |
|                |                                                           |
| N.albus        | ----GCCAUC-GGCA--ACGAUG-GUCC--GAGAUGGAUGG--UCG-----       |
| SM-A26         | GGUGAC-----ACA-U--AUCC--CAGAUGAAUGACUAUCC-----            |
| M.tuberculosis | ----GCAC-C---CGGUAACGGUGUGUCC--AGAUGGAUGG--UCGCCCGGUG     |
| LGA8           | ----GCGG-CGAGCAAUCGCC----GUCCUAGAGA--AAUGACCAUCGCCGCC---  |
| P.innocua      | ----GCCGUC-AGCAAUGACG---GUCC--GAGAUGGAUGACCGUCC-----      |
|                |                                                           |
| N.albus        | -----CCGACU-----                                          |
| SM-A26         | -----AAGACAGAAC-----CCGGCUUAC-----                        |
| M.tuberculosis | CGUUAGCUUGGCUUGGUGGC-GGCGCGGAACAGAAUCCGGCUUACAGGCCAACUCGU |
| LGA8           | -----GG-GGCUGGCACAGAAC-----CCGGCUUA-----                  |
| P.innocua      | -----ACG-----                                             |

Figure S11. Predicted alignments by ProbCons for *Nocardioides albus*, *Propioniferax innocua*, Salt Marsh A26, *Mycobacterium tuberculosis* and Lake Griffy A #8.

|                |                                                            |
|----------------|------------------------------------------------------------|
| N.albus        | CACA-----                                                  |
| SM-A26(42)     | GAGGAAAGU--CCGGGCACU-----                                  |
| M.tuberculosis | CGGAUGAGUUGGCUGGGCGGCCGCGCUCGCGUAGGGCUUGUGUGGAUUCACGAGGU   |
| LGA8           | GAGGAAAGU--CCGGGCUC-----                                   |
| P.innocua      | CACA-----                                                  |
|                |                                                            |
| N.albus        | -----GGACAGGGUGGUGGCUAACGGCCACC                            |
| SM-A26(42)     | -----AUAGGGCGGAGUGCCAGGUAACACCUGGG                         |
| M.tuberculosis | GCGUCGAGUCGAGGAAAGUCCGGACUUCACAGAGCAGGGUGAUUGCUAACGGCAAUC  |
| LGA8           | -----ACAGGACAGAGUGGUCGCUAACGGCGACC                         |
| P.innocua      | -----GAGCAGGGUGGUGGGUAACGCCACC                             |
|                |                                                            |
| N.albus        | GGUGACCCGCGGGACAGUGCCACAGAGAACAGACCGCCGCUACCCUC-----       |
| SM-A26(42)     | CGUGAGCCGACGGCAAGUGCAGCAGAGAGAAGACCGCC-UGA-----            |
| M.tuberculosis | GGUGACUCGCGGGAAAGUGCCACAGAAAACAGACCGCC---AUCC-----         |
| LGA8           | CGCAAGGCUCGGGAAAGUGCAACAGAAAAG-ACACCGCCUCCGCGAGCCCGU-----  |
| P.innocua      | GGUGACCCGCGGGCCAGUGCCACAGAGAACAGACCGCCCCGAUUGCGCCGGUUCGCCG |
|                |                                                            |
| N.albus        | GGUAGCGGUAAGGGUGAAACGGUGGGGUAAGAGCCACCAGUCCUCGUGGUGACACG   |
| SM-A26(42)     | CGUCA-GGUAAGGGUGAAAGGGUGCGGUAAGAGCGCACC-GCGCGAGUGGUAACACU  |
| M.tuberculosis | CGUGGUGGCAAGGGUGAAACGGUGCGGUAAGAGCGCACCAGCAUUCGGGUGACCGG   |
| LGA8           | CGCGGCGGUAAGGGUGAAAUGGUGCGGUAAGAGCGCACCAGCG-GCGGGUGACUCG   |
| P.innocua      | UGCCGGGGUAAGGGUGAAACGGCGGUGUAAGAGACCACCGGCACCUGAGCGAUCAC   |
|                |                                                            |
| N.albus        | GAGCUAGGUAAAACCCACCCGAGCAAGACCAGACAGCGUACGACGG----UGUUAG   |
| SM-A26(42)     | UGGCAAGGUAAAACCCACUCAGUGCAAAACCAAUAGGGGAG---AG-----        |
| M.tuberculosis | UGGCUAGGCAAAACCCACCCGAAGCAAGGCCAAGAAGGCCGC---AC----CGAAAG  |
| LGA8           | CGGCUCGGCAAACCCACUCGGAGCAAGACCAAGCAGAGAGGAGCUGCCUGCCACAA   |
| P.innocua      | UGGCCAGGUAAAACCCACCCGAGCAAGACCAGACAGCAGGC-----             |
|                |                                                            |
| N.albus        | ACUGG-----GAGGGCGGUCCGCCGAG-----UGCGCGGGUAGGUUGCUA         |
| SM-A26(42)     | -----AUG-----GUGCGGCCCGCACU-U-----CUCCCGGUAGGUUGCUU        |
| M.tuberculosis | GGCCGCGCAGGCGCUUGAGGGUUGCUCGCCCCGAG-----CCUGCGGGUAGGCCGUC  |
| LGA8           | GGCGGCACG-----GUUCGGUCCGGACCUGCGUJACUCUCGGGUAGGUUCGUCG     |
| P.innocua      | -----GGGUUGCUCGCCUUG-----CCUGCGGGUAGGUUCGUCG               |
|                |                                                            |
| N.albus        | GCCAUCGGCAACGA-UGGUCCGAGAUGGAUGGUCG-----                   |
| SM-A26(42)     | GUAUGUGGUGACAC-AUAUCCAGAUUGAAUGACU-----                    |
| M.tuberculosis | GCACCCGGUAACGGUGUGUCC-AGAUGGAUGGUCGCCGCCGUGCCGCCGUUAGCUUG  |
| LGA8           | GCGGCGAGCAAUCG-CCGUCCUAGAGAAAUGACCAUC-----GCCGCC-CAG-----  |
| P.innocua      | GCCGUCAGCAAUGA-CGGUCCGAGAUGGAUGACC-----                    |
|                |                                                            |
| N.albus        | -----CCGA-----CU                                           |
| SM-A26(42)     | ---AUC----CAAGACAGAAC-----CCGGCUU---AC                     |
| M.tuberculosis | GGUGGCGGCGCGGAACAGAAUCCGGCUUACAGGCCAACUCGUCCG              |
| LGA8           | --GGGUCG-GC---ACAGAAC-----CCGGCUU----A                     |
| P.innocua      | ---GUC-----CCA-----CG                                      |

Figure S12. Predicted alignments by MAFFT for *Nocardioides albus*, *Propioniferax innocua*, *Salt Marsh A26*, *Mycobacterium tuberculosis* and *Lake Griffy A #8*.



|                |                                                            |
|----------------|------------------------------------------------------------|
| N.albus        | -----CACAGGAC-----                                         |
| SM-A26(42)     | GAGGAAAGUCCGGGCACUAUA-GGGC-----                            |
| M.tuberculosis | -----CGGAUGAGUUGGCUGGGCGGCCGCGCUCGCGUAGGGCU                |
| LGA8           | GAGGAAAGUCCGGGCUCCACA-GGAC-----                            |
| P.innocua      | -----CACAGAGC-----                                         |
|                |                                                            |
| N.albus        | -----AGGGI                                                 |
| SM-A26(42)     | -----GGAGI                                                 |
| M.tuberculosis | UGGAUUCACGAGGUUCAGCGUCGAGUCGAGGAAAGUCCGGACUUCACAGAGCAGGGI  |
| LGA8           | -----AGAGI                                                 |
| P.innocua      | -----AGGGI                                                 |
|                |                                                            |
| N.albus        | GGCUAACGGCCACCCGGGGUGACCCGCGGGACAGUGCCACAGAGAACAG-----A    |
| SM-A26(42)     | AGGUAACACCUUGGGCGGCGUGAGCCGACGGCAAGUGCAGCAGAGAGAAG-----A   |
| M.tuberculosis | UGCUAACGGCAAUCCGAGGUGACUCGCGGGAAAGUGCCACAGAAAACAGACCCGCA   |
| LGA8           | CGCUAACGGCGACCCGGCCGCAAGGCUCGGGAAAGUGCAACAGAAA-GAC-----A   |
| P.innocua      | GGGUAACGCCACCCGGGGUGACCCGCGGGCCAGUGCCACAGAGAACAGACC---G    |
|                |                                                            |
| N.albus        | GCCGCUAC----CCU-----CC-A--GGUAGCGGUAAGGGUGAAAACGGUGGGGI    |
| SM-A26(42)     | GCC-UGAC----UC-----GUC-AGGUAAGGGUGAAAAGGGUGCGGI            |
| M.tuberculosis | -----C-----U--CGUGGUGGCAAGGGUGAAAACGGUGCGGI                |
| LGA8           | GCCUCCGCGAGCCCG-----UC-U--CGCGCGGUAAGGGUGAAAAGGGUGCGGI     |
| P.innocua      | -----GAU----GCGCCGGUUCGCCGACGUGCCGGGGUAAGGGUGAAAACGGCGGUGI |
|                |                                                            |
| N.albus        | AGCCCACCAGUCCUCGUGGUGACACG-AGGAGCUAGGUAAAACCCACCCGGAGCAA   |
| SM-A26(42)     | AGCGCACC-GCGCGAGUGGUAACACUUCGUGGCAAGGUAAAACCCACUCAGUGCAA   |
| M.tuberculosis | AGCGCACCAGCAUUCGGGUGACCGG-GGUGGCUAGGCAAACCCACCCGAAGCAA     |
| LGA8           | AGCGCACCAGCGG-CGGGGUGACUCG--CCGGCUCGGCAAACCCACUCGGAGCAA    |
| P.innocua      | AGACCACCGGCACCGUGAGCGAUCAC-GGUGGCCAGGUAAAACCCACCCGGAGCAA   |
|                |                                                            |
| N.albus        | AGACAGC--GUA-CGACGGUGUAG---UUCA-----CUGGGAGG-GCGGU---      |
| SM-A26(42)     | AAAUAGG--GGAGAGAUGG-----U-GCGGC---                         |
| M.tuberculosis | AAGAAGGCCGCACCGAAAGUGCGGC--CGCGCAG-GCGCUU-GAGG-GUUGC---    |
| LGA8           | AAGCAGA--GAG-GA----GCUGCCUGCC-ACAAGG----CGGCGGCACGGUUCG    |
| P.innocua      | AGACAGC--AGG-C-----GG-GUUGC---                             |
|                |                                                            |
| N.albus        | ----CGCCCAGUGCGCGGGUAGGUUGCUAGAGGCCAUCGGCAACGA-UGGUCCGA    |
| SM-A26(42)     | ----CGCACUUCUCCC-GGGUAGGUUGCUUGAGGUUAUGUGGUGACAC-AUAUCCCA  |
| M.tuberculosis | ----CGCCCAGCCUGCGGGUAGGCCGUCGAGGCACCCGGUAACGGUGUGU-CCA     |
| LGA8           | GGACCGUCGUUACUCUCGGGUAGGUCGUCUGGAGGCGGCGAGCAAUCG-CCGUCCUA  |
| P.innocua      | ----CGCCUUGCCUGCGGGUAGGUCGUCUGGAGGCCGUCAGCAAUGA-CGGUCCGA   |
|                |                                                            |
| N.albus        | GAU-----G----G-----                                        |
| SM-A26(42)     | AAU-----GACU-AU-----CC-----                                |
| M.tuberculosis | GAUGGUCGCCGCCGUGCCGCCGUAGCUUGGCUGG-----UGGCGGCGC           |
| LGA8           | AAU-----GACC-AUCGCCGCCAGG-----GGCI                         |
| P.innocua      | GAU-----G----A-----                                        |
|                |                                                            |
| N.albus        | -----UCG-CCGA-----CU                                       |
| SM-A26(42)     | ACAGAACCCGGCUU-----AC                                      |
| M.tuberculosis | ACAGAAUCCGGCUUACAGGCCAACUCGUCCG                            |
| LGA8           | ACAGAACCCGGCU-----UA                                       |
| P.innocua      | -----CCGUCCA-----CG                                        |

Figure S13. Predicted alignments by R-Coffee for *Nocardioides albus*, *Propioniferax innocua*, Salt Marsh A26, *Mycobacterium tuberculosis* and Lake Griffy A #8.

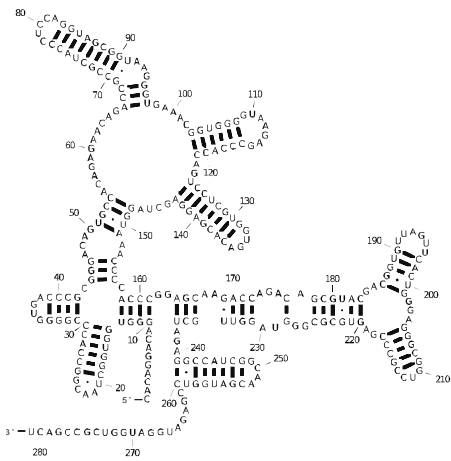

(a) *Nocardiodides albus*

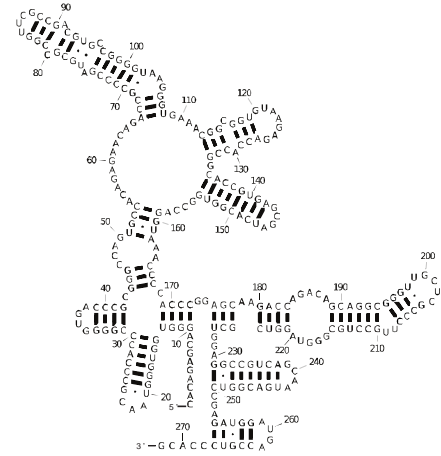

(b) *Propioniferax innocua*

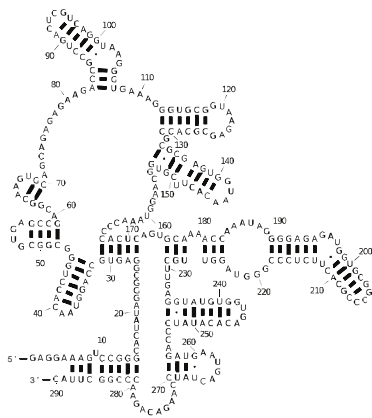

(c) *Salt Marsh A26*

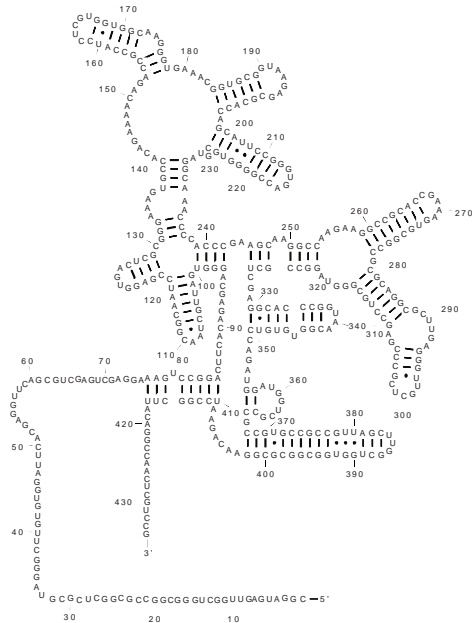

(d) *Mycobacterium tuberculosis*

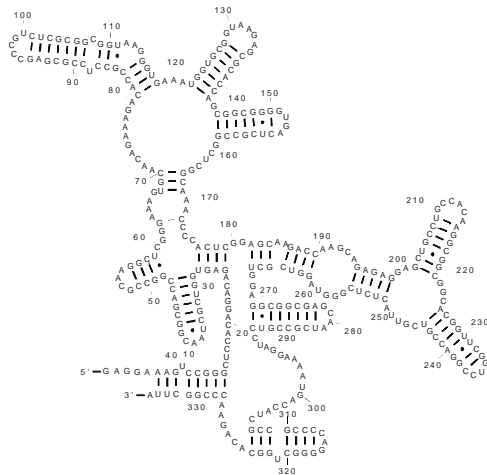

(e) *Lake Griffy A #8*

Figure S14. Predicted structures by TurboFold II for *Nocardiodides albus*, *Propioniferax innocua*, *Salt Marsh A26*, *Mycobacterium tuberculosis* and *Lake Griffy A #8*. Predicted structures for *Nocardiodides albus* (a), *Propioniferax innocua* (b), *Salt Marsh A26* (c), *Mycobacterium*

*tuberculosis* (d) and *Lake Griffy A #8* (e). 5' and 3' ends of sequences are indicated by "5'" and "3'". A heavy line between two nucleotides indicates the base pairing interaction between the nucleotides.

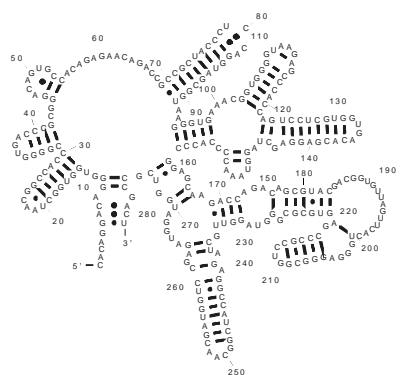

(a) *Nocardoides albus*

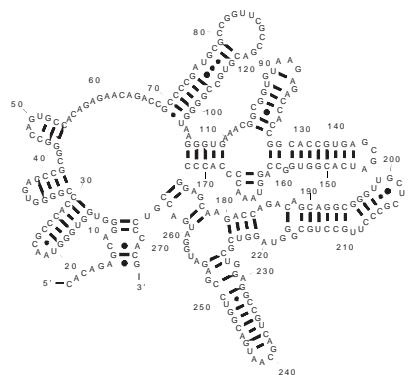

(b) *Propioniferax innocua*

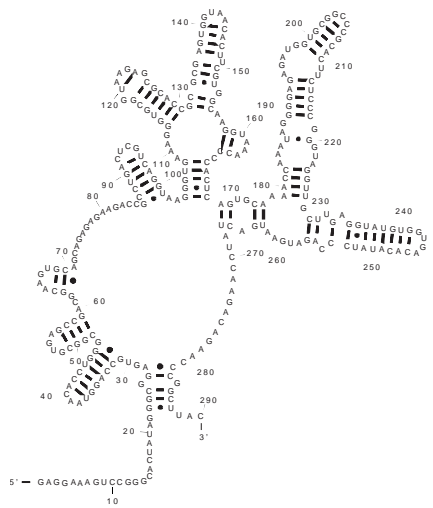

(c) Salt Marsh A26

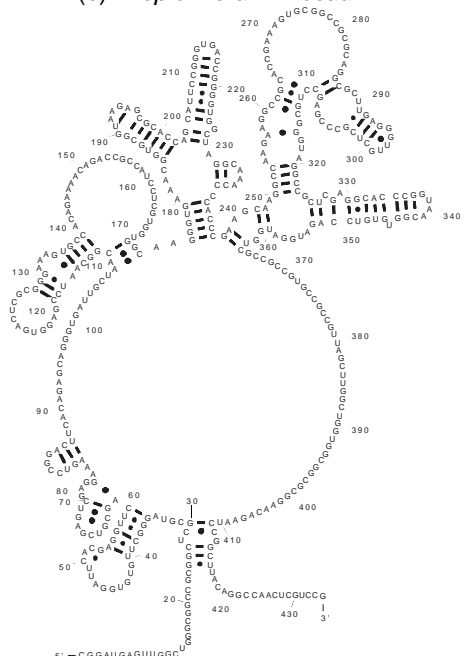

(d) *Mycobacterium tuberculosis*

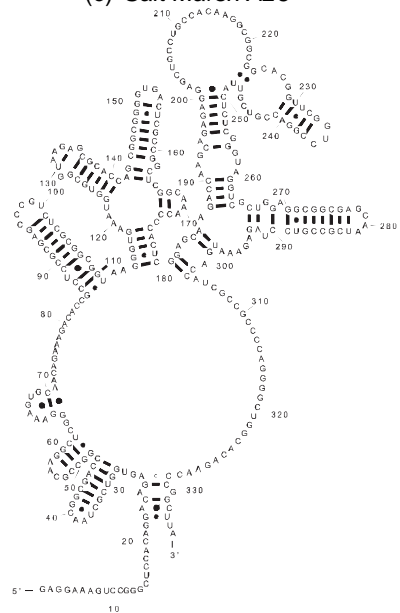

(e) Lake Griffy A #8

Figure S15. Predicted structures by LocARNA for *Nocardoides albus*, *Propioniferax innocua*, *Salt Marsh A26*, *Mycobacterium tuberculosis* and *Lake Griffy A #8*. Predicted structures for

*Nocardioides albus* (a), *Propioniferax innocua* (b), *Salt Marsh A26* (c), *Mycobacterium tuberculosis* (d) and *Lake Griffy A #8* (e). 5' and 3' ends of sequences are indicated by "5'" and "3'". A heavy line between two nucleotides indicates the base pairing interaction between the nucleotides.

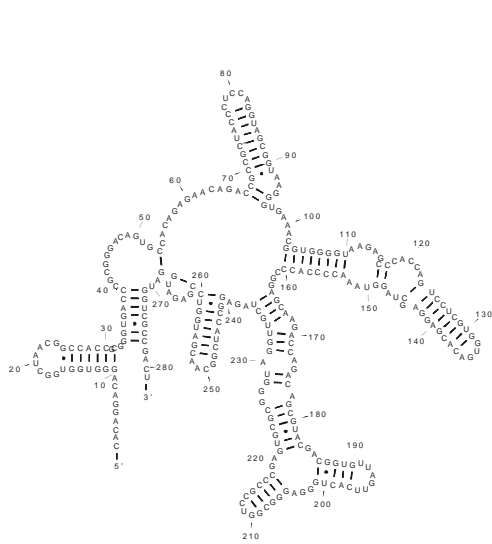

(a) *Nocardiooides albus*

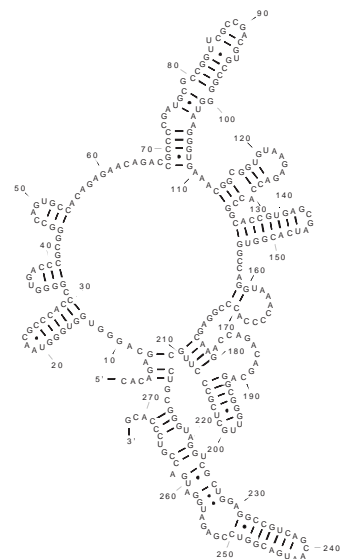

(b) *Propioniferax innocua*

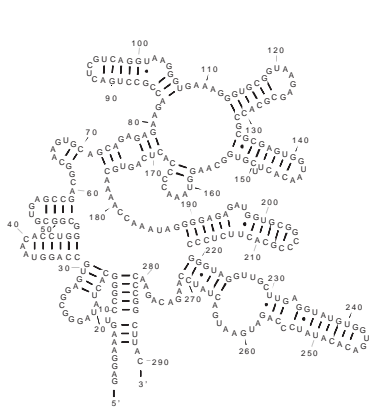

(c) Salt Marsh A26

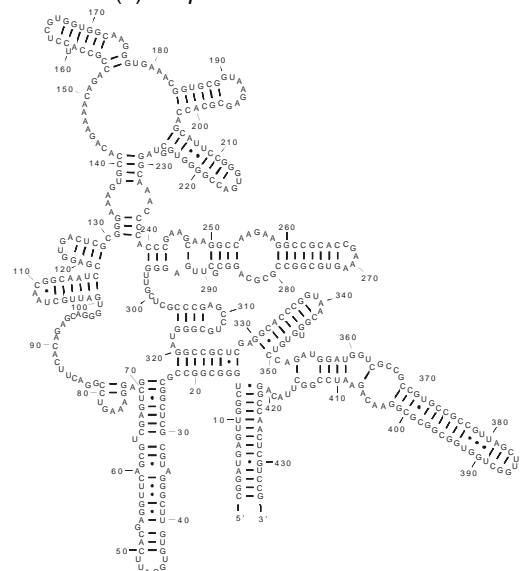

(d) *Mycobacterium tuberculosis*

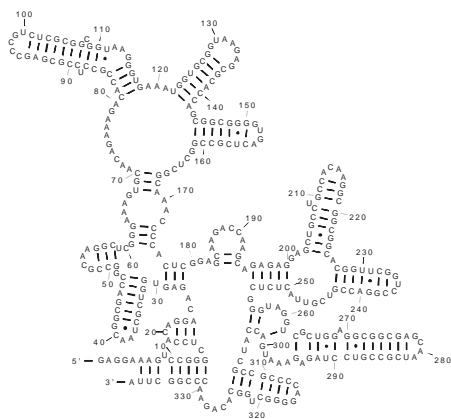

(e) Lake Griffy A #8

Figure S16. Predicted structures by MaxExpect for *Nocardiooides albus*, *Propioniferax innocua*, Salt Marsh A26, *Mycobacterium tuberculosis* and Lake Griffy A #8. Predicted structures for

*Nocardioides albus* (a), *Propioniferax innocua* (b), *Salt Marsh A26* (c), *Mycobacterium tuberculosis* (d) and *Lake Griffy A #8* (e). 5' and 3' ends of sequences are indicated by "5'" and "3'". A heavy line between two nucleotides indicates the base pairing interaction between the nucleotides.



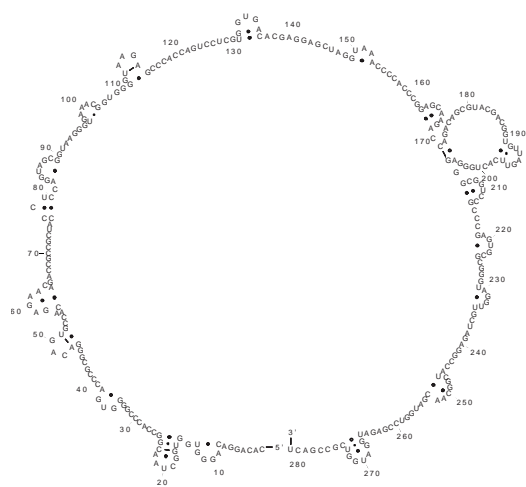

(a) *Nocardiooides albus*

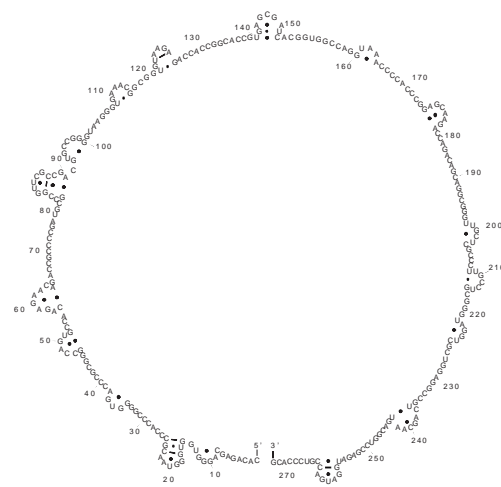

(b) *Propioniferax innocua*

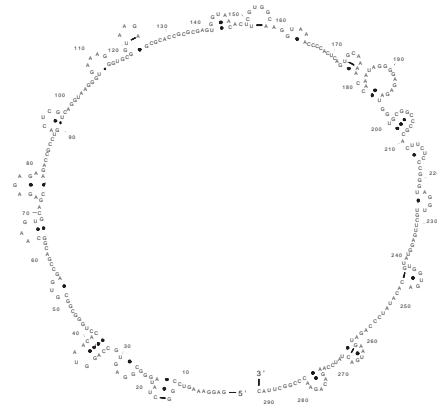

(c) Salt Marsh A26

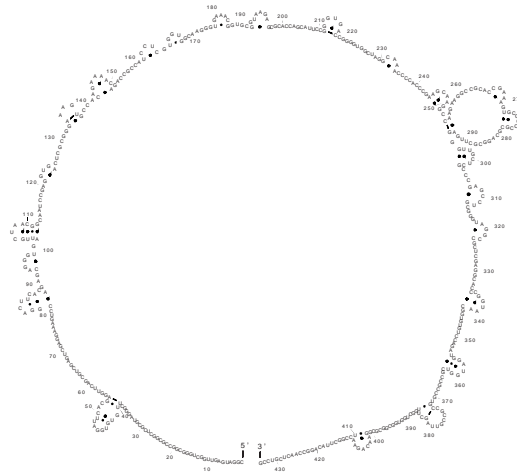

(d) *Mycobacterium tuberculosis*

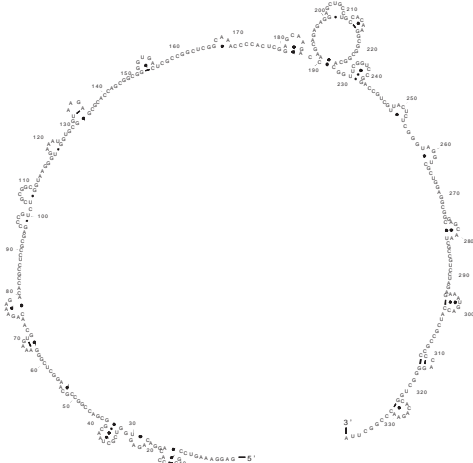

(e) Lake Griffy A #8

Figure S17. Predicted structures by MXSCARNA for *Nocardiooides albus*, *Propioniferax innocua*, *Salt Marsh A26*, *Mycobacterium tuberculosis* and *Lake Griffy A #8*. Predicted structures for *Nocardiooides albus* (a), *Propioniferax innocua* (b), *Salt Marsh A26* (c), *Mycobacterium*

*tuberculosis* (d) and *Lake Griffy A #8* (e). 5' and 3' ends of sequences are indicated by "5'" and "3'". A heavy line between two nucleotides indicates the base pairing interaction between the nucleotides.

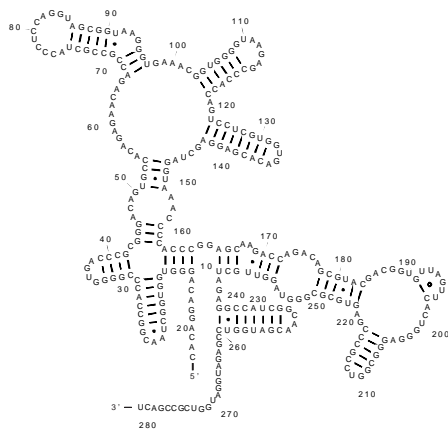

(a) *Nocardiooides albus*

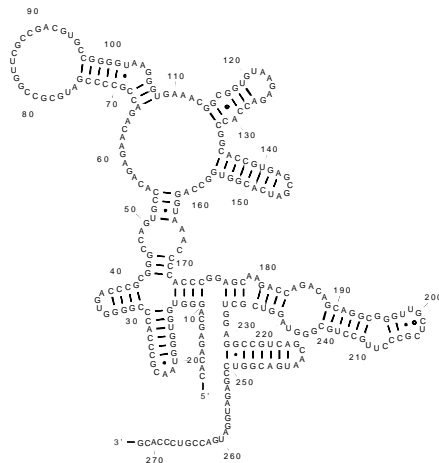

(b) *Propioniferax innocua*

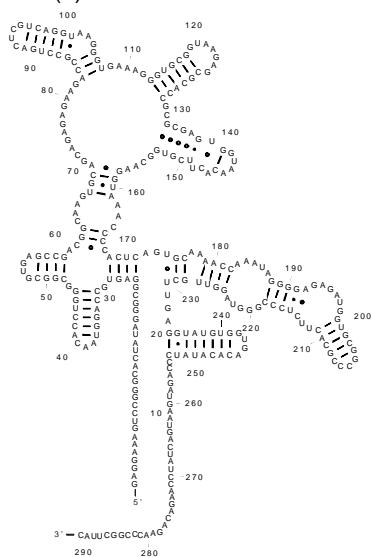

(c) Salt Marsh A26

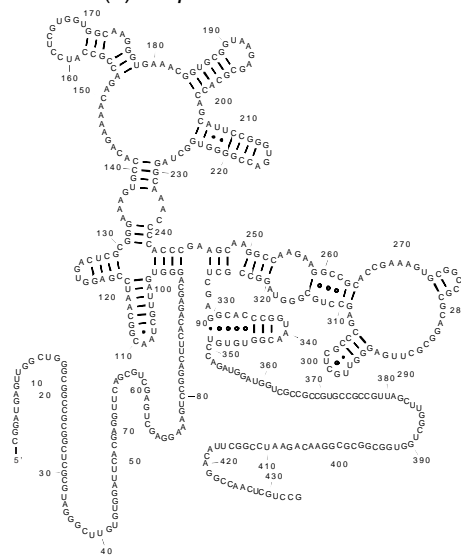

(d) *Mycobacterium tuberculosis*

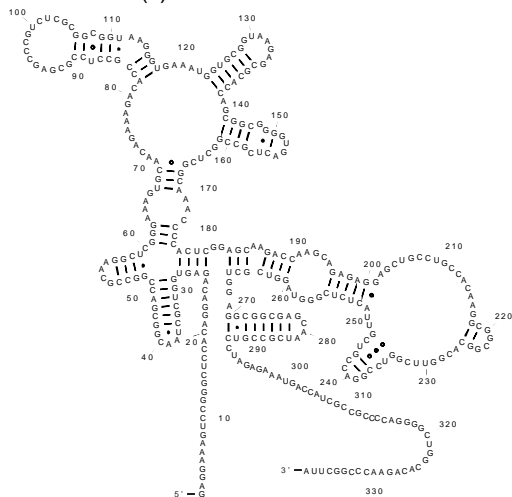

(e) Lake Griffy A #8

Figure S18. Predicted structures by RNAalifold (using Clustal Omega) for *Nocardiooides albus*, *Propioniferax innocua*, Salt Marsh A26, *Mycobacterium tuberculosis* and Lake Griffy A #8.

Predicted structures for *Nocardioides albus* (a), *Propioniferax innocua* (b), *Salt Marsh A26* (c), *Mycobacterium tuberculosis* (d) and *Lake Griffy A #8* (e). 5' and 3' ends of sequences are indicated by "5'" and "3'". A heavy line between two nucleotides indicates the base pairing interaction between the nucleotides.

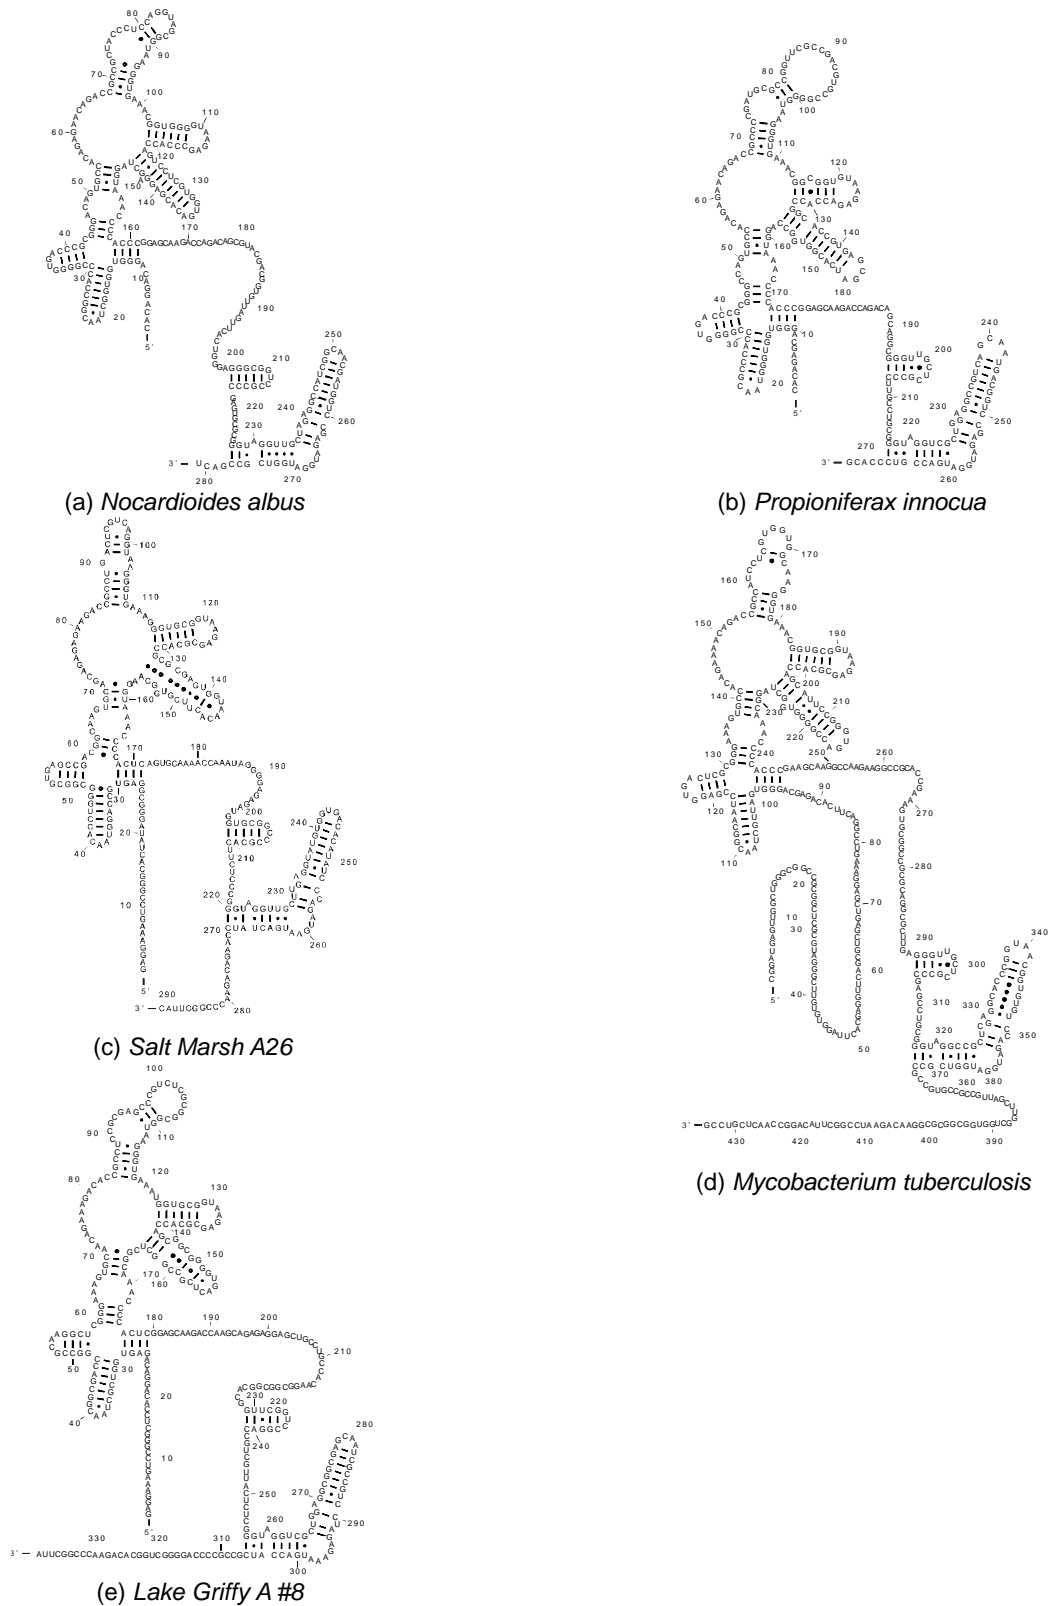

Figure S19. Predicted structures by RNAalifold (using ClustalW) for *Nocardoides albus*, *Propioniferax innocua*, Salt Marsh A26, *Mycobacterium tuberculosis* and Lake Griffy A #8.

Predicted structures for *Nocardioides albus* (a), *Propioniferax innocua* (b), *Salt Marsh A26* (c), *Mycobacterium tuberculosis* (d) and *Lake Griffy A #8* (e). 5' and 3' ends of sequences are indicated by "5'" and "3'". A heavy line between two nucleotides indicates the base pairing interaction between the nucleotides.



*tuberculosis* (d) and *Lake Griffy A #8* (e). 5' and 3' ends of sequences are indicated by "5'" and "3'". A heavy line between two nucleotides indicates the base pairing interaction between the nucleotides.



## Section 7. Run time of TurboFold II

Table S3. Run time of the program over the selected families and different number of input sequences. The calculations were run on one core on a machine with an Intel® Core™ i7-4790 CPU @ 3.60GHz.

| Family                   | <i>H=5 sequences</i> | <i>H=10 sequences</i> | <i>H=20 sequences</i> |
|--------------------------|----------------------|-----------------------|-----------------------|
| <i>tRNA</i>              | 2.57s                | 7.31s                 | 23.8s                 |
| <i>RNase P</i>           | 55.89s               | 2m3.67s               | 9m52.87s              |
| <i>Small subunit RNA</i> | 51m3.04s             | 1h52m30s              | 7h14m46s              |

## References:

1. Harmanci, A.O., Sharma, G. and Mathews, D.H. (2007) Efficient pairwise RNA structure prediction using probabilistic alignment constraints in Dynalign. *BMC Bioinformatics*, **8**, 130.
2. Durbin, R., Eddy, S.R., Krogh, A. and Mitchison, G. (1998) *Biological sequence analysis: probabilistic models of proteins and nucleic acids*. Cambridge University Press, Cambridge, United Kingdom.
3. Gutell, R.R. (1994) Collection of small subunit (16S- and 16S-like) ribosomal RNA structures: 1994. *Nucleic Acids Res.*, **22**, 3502-3507.
4. Szymanski, M., Barciszewska, M.Z., Erdmann, V.A. and Barciszewski, J. (2002) 5S Ribosomal RNA Database. *Nucleic Acids Res.*, **30**, 176-178.
5. Zhou, Y., Lu, C., Wu, Q.J., Wang, Y., Sun, Z.T., Deng, J.C. and Zhang, Y. (2008) GISSD: Group I Intron Sequence and Structure Database. *Nucleic Acids Res.*, **36**, D31-37.
6. Brown, J.W. (1999) The Ribonuclease P Database. *Nucleic Acids Res.*, **27**, 314.
7. Rosenblad, M.A., Gorodkin, J., Knudsen, B., Zwieb, C. and Samuelsson, T. (2003) SRPDB: Signal Recognition Particle Database. *Nucleic Acids Res.*, **31**, 363-364.
8. Nawrocki, E.P., Burge, S.W., Bateman, A., Daub, J., Eberhardt, R.Y., Eddy, S.R., Floden, E.W., Gardner, P.P., Jones, T.A., Tate, J. *et al.* (2015) Rfam 12.0: updates to the RNA families database. *Nucleic Acids Res.*, **43**, D130-137.
9. Zwieb, C., Gorodkin, J., Knudsen, B., Burks, J. and Wower, J. (2003) tmRDB (tmRNA database). *Nucleic Acids Res.*, **31**, 446-447.
10. Juhling, F., Morl, M., Hartmann, R.K., Sprinzl, M., Stadler, P.F. and Putz, J. (2009) tRNADB 2009: compilation of tRNA sequences and tRNA genes. *Nucleic Acids Res.*, **37**, D159-162.
11. Gardner, P.P., Wilm, A. and Washietl, S. (2005) A benchmark of multiple sequence alignment programs upon structural RNAs. *Nucleic Acids Res.*, **33**, 2433-2439.
